# Supplementary material for: Resource depletion through primate stone technology
Source: eLife. 2017 Sep 8;6:e23647. doi: 10.7554/eLife.23647 (PMC5590808; doi:10.7554/eLife.23647)
Supplement: Figure 1—source data 1. — Shellfish foraging stone tools collected on Koram and NomSao Islands, Thailand. [file elife-23647-fig1-data1.xlsx]

## Sheet: Sheet1
Tool_Nr	Date	Population	Individual	Sex	Food	Weight
1	7_10_15	NomSao	Tank	male	Oyster	70.2
2	7_10_15	NomSao	Tank	male	Oyster	185.1
3	7_10_15	NomSao	Tank	male	Oyster	102.6
4	7_10_15	NomSao	Tank	male	Oyster	217.2
5	7_10_15	NomSao	Tank	male	Oyster	123.2
6	7_10_15	NomSao	Tank	male	Oyster	191
7	8_10_15	NomSao	Tank	male	Oyster	145.6
8	8_10_15	NomSao	Tank	male	Oyster	64
9	8_10_15	NomSao	Tank	male	Oyster	98.9
11	8_10_15	NomSao	Austin	male	Oyster	177.1
12	8_10_15	NomSao	Austin	male	Oyster	132.3
13	9_10_15	NomSao	Austin	male	Oyster	176
14	9_10_15	NomSao	Austin	male	Oyster	133.1
15	9_10_15	NomSao	Sylvester	male	Oyster	110
16	9_10_15	NomSao	Sylvester	male	Oyster	200.3
17	9_10_15	NomSao	Sylvester	male	Oyster	88.5
28	9_10_15	NomSao	Unknown	male	Oyster	81.2
29	9_10_15	NomSao	Unknown	male	Oyster	63.8
30	10_10_15	NomSao	Sylvester	male	Oyster	152.1
31	10_10_15	NomSao	Tank	male	Oyster	144.3
32	12_10_15	NomSao	Sylvester	male	Oyster	114.3
33	12_10_15	NomSao	Sylvester	male	Oyster	51.6
34	12_10_15	NomSao	Sylvester	male	Oyster	126.8
35	12_10_15	NomSao	Tank	male	Oyster	93.1
37	13_10_15	NomSao	Sylvester	male	Oyster	119.1
38	13_10_15	NomSao	Sylvester	male	Oyster	137.7
39	13_10_15	NomSao	Sylvester	male	Oyster	195.8
40	13_10_15	NomSao	Tank	male	Oyster	119.6
41	20_10_15	NomSao	Tank	male	Oyster	40.2
42	20_10_15	NomSao	Tank	male	Oyster	69.1
44	21_10_15	NomSao	Tank	male	Oyster	189.3
45	21_10_15	NomSao	Tank	male	Oyster	95.8
46	21_10_15	NomSao	Tank	male	Oyster	147.7
47	21_10_15	NomSao	Tank	male	Oyster	101.6
48	22_10_15	NomSao	Usain	male	Oyster	110.1
49	22_10_15	NomSao	Usain	male	Oyster	65.1
50	22_10_15	NomSao	Tank	male	Oyster	55.6
51	22_10_15	NomSao	Austin	male	Oyster	102.3
52	22_10_15	NomSao	Austin	male	Oyster	112.6
53	23_10_15	NomSao	Austin	male	Oyster	91.8
54	24_10_15	NomSao	Austin	male	Oyster	61.6
55	24_10_15	NomSao	Sylvester	male	Oyster	154
56	24_10_15	NomSao	Sylvester	male	Oyster	58.3
57	24_10_15	NomSao	Sylvester	male	Oyster	168.8
58	24_10_15	NomSao	Tank	male	Oyster	45.8
59	24_10_15	NomSao	Tank	male	Oyster	57.3
103	8_10_15	NomSao	Austin	male	Oyster	177.1
104	8_10_15	NomSao	Austin	male	Oyster	132.3
105	9_10_15	NomSao	Austin	male	Oyster	176
106	9_10_15	NomSao	Austin	male	Oyster	133.1
107	22_10_15	NomSao	Austin	male	Oyster	102.3
108	22_10_15	NomSao	Austin	male	Oyster	112.8
109	23_10_15	NomSao	Austin	male	Oyster	91.8
110	24_10_15	NomSao	Austin	male	Oyster	61.6
112	12_10_15	NomSao	Sylvester	male	Oyster	51.6
113	12_10_15	NomSao	Sylvester	male	Oyster	126.8
114	9_10_15	NomSao	Sylvester	male	Oyster	110
115	9_10_15	NomSao	Sylvester	male	Oyster	200.3
116	9_10_15	NomSao	Sylvester	male	Oyster	88.5
117	10_10_15	NomSao	Sylvester	male	Oyster	152.1
118	13_10_15	NomSao	Sylvester	male	Oyster	119.1
119	13_10_15	NomSao	Sylvester	male	Oyster	137.7
120	13_10_15	NomSao	Sylvester	male	Oyster	195.8
122	24_10_15	NomSao	Sylvester	male	Oyster	154
123	24_10_15	NomSao	Sylvester	male	Oyster	58.3
124	24_10_15	NomSao	Sylvester	male	Oyster	168.8
125	12_10_15	NomSao	Tank	male	Oyster	93.1
127	7_10_15	NomSao	Tank	male	Oyster	70.2
128	7_10_15	NomSao	Tank	male	Oyster	185.1
129	7_10_15	NomSao	Tank	male	Oyster	102.6
130	7_10_15	NomSao	Tank	male	Oyster	217.2
131	7_10_15	NomSao	Tank	male	Oyster	123.2
132	7_10_15	NomSao	Tank	male	Oyster	191
133	8_10_15	NomSao	Tank	male	Oyster	145.6
134	8_10_15	NomSao	Tank	male	Oyster	64
135	8_10_15	NomSao	Tank	male	Oyster	98.9
136	10_10_15	NomSao	Tank	male	Oyster	144.3
137	13_10_15	NomSao	Tank	male	Oyster	119.6
138	20_10_15	NomSao	Tank	male	Oyster	40.2
139	20_10_15	NomSao	Tank	male	Oyster	69.1
140	21_10_15	NomSao	Tank	male	Oyster	89.3
141	21_10_15	NomSao	Tank	male	Oyster	95.8
142	21_10_15	NomSao	Tank	male	Oyster	147.7
143	21_10_15	NomSao	Tank	male	Oyster	101.6
144	22_10_15	NomSao	Tank	male	Oyster	55.6
145	24_10_15	NomSao	Tank	male	Oyster	45.8
146	24_10_15	NomSao	Tank	male	Oyster	57.3
147	22_10_15	NomSao	Usain	male	Oyster	110.1
148	22_10_15	NomSao	Usain	male	Oyster	65.1
159	22_10_15	NomSao	X	male	Oyster	81.2
160	22_10_15	NomSao	X	male	Oyster	63.8
18	9_10_15	NomSao	Unknown	male	Snail	90.3
19	9_10_15	NomSao	Unknown	male	Snail	362.4
23	9_10_15	NomSao	Unknown	male	Snail	173.9
24	9_10_15	NomSao	Unknown	male	Snail	187.1
27	9_10_15	NomSao	Unknown	male	Snail	171.6
36	12_10_15	NomSao	Unknown	male	Snail	99.2
43	20_10_15	NomSao	Unknown	male	Snail	349.1
60	24_10_15	NomSao	Unknown	male	Snail	225.8
111	12_10_15	NomSao	Sylvester	male	Snail	114.3
121	21_10_15	NomSao	Sylvester	male	Snail	293.6
126	20_10_15	NomSao	Tank	male	Snail	349.1
149	22_10_15	NomSao	X	male	Snail	90.3
150	22_10_15	NomSao	X	male	Snail	362.4
151	22_10_15	NomSao	X	male	Snail	177.3
152	22_10_15	NomSao	X	male	Snail	700
154	22_10_15	NomSao	X	male	Snail	173.9
155	22_10_15	NomSao	X	male	Snail	187.1
158	22_10_15	NomSao	X	male	Snail	171.6
162	19_10_15	NomSao	X	male	Snail	197.9
163	19_10_15	NomSao	X	male	Snail	207.3
164	21_10_15	NomSao	X	male	Snail	160.1
165	21_10_15	NomSao	X	male	Snail	169
166	24_10_15	NomSao	X	male	Snail	225.8
214	8_10_15	Koram	Stone	male	Oyster	78.3
229	9_10_15	Koram	Turtle	male	Oyster	65.6
231	23_10_15	Koram	Turtle	male	Oyster	67
232	23_10_15	Koram	Whale	male	Oyster	90.2
233	23_10_15	Koram	Whale	male	Oyster	150.9
235	23_10_15	Koram	Whale	male	Oyster	125.5
238	23_10_15	Koram	Twirl	male	Oyster	79.6
239	23_10_15	Koram	Whale	male	Oyster	235.4
241	23_10_15	Koram	Whale	male	Oyster	163
242	23_10_15	Koram	Whale	male	Oyster	95.5
244	12_10_15	Koram	Burglar	male	Oyster	36
245	12_10_15	Koram	Burglar	male	Oyster	44.5
246	12_10_15	Koram	Burglar	male	Oyster	39.4
247	12_10_15	Koram	Burglar	male	Oyster	32.9
250	12_10_15	Koram	Twirl	male	Oyster	162.7
252	12_10_15	Koram	Turtle	male	Oyster	193.5
253	12_10_15	Koram	Turtle	male	Oyster	55.1
254	12_10_15	Koram	Turtle	male	Oyster	115.4
256	12_10_15	Koram	Whale	male	Oyster	107.5
257	12_10_15	Koram	Stingray	male	Oyster	38
258	12_10_15	Koram	Stingray	male	Oyster	93.5
259	12_10_15	Koram	Twirl	male	Oyster	166.5
260	12_10_15	Koram	Twirl	male	Oyster	80.1
261	12_10_15	Koram	Twirl	male	Oyster	51.4
262	12_10_15	Koram	Twirl	male	Oyster	34.6
263	13_10_15	Koram	Strength	male	Oyster	123.9
269	13_10_15	Koram	Burglar	male	Oyster	45.2
278	14_10_15	Koram	Lucky	male	Oyster	99
298	10_10_15	Koram	Twirl	male	Oyster	79.4
299	10_10_15	Koram	Twirl	male	Oyster	57.4
300	10_10_15	Koram	Burglar	male	Oyster	129.7
301	10_10_15	Koram	Burglar	male	Oyster	77.4
302	10_10_15	Koram	Burglar	male	Oyster	124.5
303	10_10_15	Koram	Stingray	male	Oyster	46.8
307	10_10_15	Koram	Stone	male	Oyster	58.9
321	10_10_15	Koram	Turtle	male	Oyster	86.7
322	10_10_15	Koram	Turtle	male	Oyster	135.7
323	10_10_15	Koram	Turtle	male	Oyster	60.3
324	10_10_15	Koram	Turtle	male	Oyster	145.6
385	7_10_15	Koram	Lucky	male	Oyster	187.3
458	7_10_15	Koram	Burglar	male	Oyster	110.4
459	7_10_15	Koram	Strength	male	Oyster	23.9
460	7_10_15	Koram	Burglar	male	Oyster	110.1
631	26_3_15	Koram	Monster	male	Oyster	79.5
632	26_3_15	Koram	Monster	male	Oyster	67.9
633	26_3_15	Koram	Monster	male	Oyster	104.3
634	25_3_14	Koram	Elephant	male	Oyster	92.5
635	25_3_14	Koram	Elephant	male	Oyster	79.3
636	22_9_15	Koram	Whale	male	Oyster	70.1
637	29_3_14	Koram	Shark	male	Oyster	58.7
638	29_3_14	Koram	Shark	male	Oyster	72.6
639	29_3_14	Koram	Shark	male	Oyster	145
640	25_3_14	Koram	Clam	male	Oyster	73.7
641	25_3_14	Koram	Clam	male	Oyster	30.9
642	25_3_14	Koram	Clam	male	Oyster	65.4
643	3_4_14	Koram	Burglar	male	Oyster	55
644	3_4_14	Koram	Burglar	male	Oyster	72.4
645	25_3_14	Koram	Lucky	male	Oyster	208.5
646	25_3_14	Koram	Lucky	male	Oyster	120.9
647	25_3_14	Koram	Lucky	male	Oyster	159
648	25_3_14	Koram	Lucky	male	Oyster	87.1
649	25_3_14	Koram	Lucky	male	Oyster	29.1
650	25_3_14	Koram	Lucky	male	Oyster	32.2
652	25_3_14	Koram	Lucky	male	Oyster	61.2
653	25_3_14	Koram	Lucky	male	Oyster	110.4
654	25_3_14	Koram	Lucky	male	Oyster	80.5
655	25_3_14	Koram	Turtle	male	Oyster	83.1
656	25_3_14	Koram	Turtle	male	Oyster	96.9
657	25_3_14	Koram	Turtle	male	Oyster	55.2
658	25_3_14	Koram	Turtle	male	Oyster	59.9
659	25_3_14	Koram	Turtle	male	Oyster	74
660	25_3_14	Koram	Turtle	male	Oyster	87.2
661	25_3_14	Koram	Turtle	male	Oyster	91.3
662	25_3_14	Koram	Turtle	male	Oyster	85
664	25_3_14	Koram	Turtle	male	Oyster	94.1
665	25_3_14	Koram	Turtle	male	Oyster	66.4
666	25_3_14	Koram	Turtle	male	Oyster	113.1
667	25_3_14	Koram	Stone	male	Oyster	29.2
669	25_3_14	Koram	Stone	male	Oyster	66.8
670	25_3_14	Koram	Stone	male	Oyster	76.4
671	25_3_14	Koram	Stone	male	Oyster	108.2
684	25_3_14	Koram	Otter	male	Oyster	29.8
686	25_3_14	Koram	Otter	male	Oyster	48.9
687	25_3_14	Koram	Otter	male	Oyster	46.4
688	25_3_14	Koram	Otter	male	Oyster	87
689	25_3_14	Koram	Otter	male	Oyster	36.5
692	25_3_14	Koram	Otter	male	Oyster	27.7
693	25_3_14	Koram	Otter	male	Oyster	53.5
694	25_3_14	Koram	Otter	male	Oyster	39
695	25_3_14	Koram	Otter	male	Oyster	89.2
696	25_3_14	Koram	Otter	male	Oyster	66.9
697	25_3_14	Koram	Otter	male	Oyster	26.4
698	25_3_14	Koram	Otter	male	Oyster	46.7
699	25_3_14	Koram	Otter	male	Oyster	49.3
210	8_10_15	Koram	Lucky	male	Snail	76.3
211	8_10_15	Koram	Lucky	male	Snail	58
212	8_10_15	Koram	Turtle	male	Snail	152.5
213	8_10_15	Koram	Stone	male	Snail	86.8
218	21_10_15	Koram	Stone	male	Snail	148.9
219	21_10_15	Koram	Lucky	male	Snail	98.2
220	21_10_15	Koram	Lucky	male	Snail	149.4
221	21_10_15	Koram	Lucky	male	Snail	131.1
228	9_10_15	Koram	Lucky	male	Snail	111.2
237	23_10_15	Koram	Twirl	male	Snail	154.9
240	23_10_15	Koram	Otter	male	Snail	190.5
243	12_10_15	Koram	Otter	male	Snail	101.1
251	12_10_15	Koram	Lucky	male	Snail	143
264	13_10_15	Koram	Elephant	male	Snail	258.2
266	13_10_15	Koram	Elephant	male	Snail	164.1
270	13_10_15	Koram	Elephant	male	Snail	96.5
273	14_10_15	Koram	Stone	male	Snail	66.4
274	14_10_15	Koram	Stone	male	Snail	178.8
275	14_10_15	Koram	Stone	male	Snail	266.2
276	14_10_15	Koram	Lucky	male	Snail	63
279	14_10_15	Koram	Otter	male	Snail	96.8
304	10_10_15	Koram	Lucky	male	Snail	120.9
305	10_10_15	Koram	Lucky	male	Snail	240.4
306	10_10_15	Koram	Lucky	male	Snail	196.2
326	10_10_15	Koram	Lucky	male	Snail	86
327	10_10_15	Koram	Lucky	male	Snail	92.8
374	7_10_15	Koram	Lucky	male	Snail	115.3
386	7_10_15	Koram	Lucky	male	Snail	148.3
445	7_10_15	Koram	Elephant	male	Snail	138.4
446	7_10_15	Koram	Elephant	male	Snail	161.2
447	7_10_15	Koram	Turtle	male	Snail	153.7
449	7_10_15	Koram	Turtle	male	Snail	60.7
450	7_10_15	Koram	Turtle	male	Snail	45.6
451	7_10_15	Koram	Strength	male	Snail	119.1
452	7_10_15	Koram	Strength	male	Snail	104.2
453	7_10_15	Koram	Twirl	male	Snail	70.3
454	7_10_15	Koram	Twirl	male	Snail	191.4
455	7_10_15	Koram	Otter	male	Snail	101.5
456	7_10_15	Koram	Otter	male	Snail	83.1
457	7_10_15	Koram	Otter	male	Snail	92.6
651	25_3_14	Koram	Lucky	male	Snail	118.4
663	25_3_14	Koram	Turtle	male	Snail	66
668	25_3_14	Koram	Stone	male	Snail	82.5
672	25_3_14	Koram	Stone	male	Snail	90.6
690	25_3_14	Koram	Otter	male	Snail	77
691	25_3_14	Koram	Otter	male	Snail	69
