# Supplementary material for: Resource depletion through primate stone technology
Source: eLife. 2017 Sep 8;6:e23647. doi: 10.7554/eLife.23647 (PMC5590808; doi:10.7554/eLife.23647)
Supplement: Figure 3—source data 1. — The number and weight of stones located in 20 × 20 cm plots on Koram and NomSao Islands, Thailand. [file elife-23647-fig3-data1.xlsx]

## Sheet: Island Plots
Nr	Date	Population	Plot_Nr	Zone	Weight	GPS_lat	GPS_long
1	8_10_2015	NomSao	2	tidal	32.7	12.2297	100.004
2	8_10_2015	NomSao	2	tidal	80.5	12.2297	100.004
3	8_10_2015	NomSao	2	tidal	56.2	12.2297	100.004
4	8_10_2015	NomSao	2	tidal	33	12.2297	100.004
5	8_10_2015	NomSao	2	tidal	11.4	12.2297	100.004
6	8_10_2015	NomSao	2	tidal	20.8	12.2297	100.004
7	8_10_2015	NomSao	2	tidal	63.5	12.2297	100.004
8	8_10_2015	NomSao	2	tidal	30.5	12.2297	100.004
9	8_10_2015	NomSao	2	tidal	262.9	12.2297	100.004
10	8_10_2015	NomSao	2	tidal	32.8	12.2297	100.004
11	8_10_2015	NomSao	2	tidal	44.8	12.2297	100.004
12	8_10_2015	NomSao	2	tidal	27.1	12.2297	100.004
13	8_10_2015	NomSao	2	tidal	28.4	12.2297	100.004
14	8_10_2015	NomSao	2	tidal	197.8	12.2297	100.004
15	8_10_2015	NomSao	2	tidal	41.2	12.2297	100.004
16	8_10_2015	NomSao	2	tidal	201.8	12.2297	100.004
17	8_10_2015	NomSao	2	tidal	51.6	12.2297	100.004
18	8_10_2015	NomSao	2	oyster_bed	138.5	12.2297	100.004
19	8_10_2015	NomSao	2	oyster_bed	54.2	12.2297	100.004
20	8_10_2015	NomSao	2	oyster_bed	52.2	12.2297	100.004
21	8_10_2015	NomSao	2	oyster_bed	93.6	12.2297	100.004
22	8_10_2015	NomSao	2	oyster_bed	100.8	12.2297	100.004
23	8_10_2015	NomSao	2	oyster_bed	37.3	12.2297	100.004
24	8_10_2015	NomSao	2	oyster_bed	25.2	12.2297	100.004
25	8_10_2015	NomSao	2	oyster_bed	49.1	12.2297	100.004
26	8_10_2015	NomSao	2	oyster_bed	108.9	12.2297	100.004
27	8_10_2015	NomSao	2	oyster_bed	52	12.2297	100.004
28	8_10_2015	NomSao	2	oyster_bed	29.4	12.2297	100.004
29	8_10_2015	NomSao	2	oyster_bed	185.9	12.2297	100.004
30	8_10_2015	NomSao	2	oyster_bed	91.1	12.2297	100.004
31	8_10_2015	NomSao	2	oyster_bed	50.6	12.2297	100.004
32	8_10_2015	NomSao	2	oyster_bed	58.6	12.2297	100.004
33	8_10_2015	NomSao	2	oyster_bed	51.1	12.2297	100.004
34	8_10_2015	NomSao	2	oyster_bed	75.2	12.2297	100.004
35	8_10_2015	NomSao	2	oyster_bed	43.6	12.2297	100.004
36	8_10_2015	NomSao	2	oyster_bed	35.1	12.2297	100.004
37	8_10_2015	NomSao	2	oyster_bed	167.5	12.2297	100.004
38	8_10_2015	NomSao	2	oyster_bed	49.4	12.2297	100.004
39	8_10_2015	NomSao	2	oyster_bed	88.7	12.2297	100.004
40	8_10_2015	NomSao	2	oyster_bed	351.4	12.2297	100.004
41	8_10_2015	NomSao	2	oyster_bed	47.9	12.2297	100.004
42	8_10_2015	NomSao	2	oyster_bed	28.8	12.2297	100.004
43	8_10_2015	NomSao	2	oyster_bed	38.8	12.2297	100.004
44	8_10_2015	NomSao	2	oyster_bed	46.7	12.2297	100.004
45	8_10_2015	NomSao	2	oyster_bed	26	12.2297	100.004
46	8_10_2015	NomSao	2	oyster_bed	22.5	12.2297	100.004
47	8_10_2015	NomSao	2	oyster_bed	55.1	12.2297	100.004
48	8_10_2015	NomSao	2	oyster_bed	20.6	12.2297	100.004
49	8_10_2015	NomSao	2	oyster_bed	30.6	12.2297	100.004
50	8_10_2015	NomSao	2	oyster_bed	50.5	12.2297	100.004
51	8_10_2015	NomSao	2	oyster_bed	103.8	12.2297	100.004
52	8_10_2015	NomSao	2	oyster_bed	56	12.2297	100.004
53	8_10_2015	NomSao	2	oyster_bed	88.6	12.2297	100.004
54	8_10_2015	NomSao	2	oyster_bed	89.1	12.2297	100.004
55	8_10_2015	NomSao	2	oyster_bed	19.7	12.2297	100.004
56	8_10_2015	NomSao	2	oyster_bed	349.6	12.2297	100.004
57	8_10_2015	NomSao	2	oyster_bed	36.5	12.2297	100.004
58	8_10_2015	NomSao	2	oyster_bed	42.7	12.2297	100.004
59	8_10_2015	NomSao	2	oyster_bed	25.5	12.2297	100.004
60	8_10_2015	NomSao	2	oyster_bed	19.6	12.2297	100.004
61	8_10_2015	NomSao	2	oyster_bed	32.4	12.2297	100.004
62	8_10_2015	NomSao	2	oyster_bed	26.5	12.2297	100.004
63	8_10_2015	NomSao	2	oyster_bed	21.2	12.2297	100.004
64	8_10_2015	NomSao	1	tidal	35.6	12.2294	100.005
65	8_10_2015	NomSao	1	tidal	78.5	12.2294	100.005
66	8_10_2015	NomSao	1	tidal	29.3	12.2294	100.005
67	8_10_2015	NomSao	1	tidal	93.4	12.2294	100.005
68	8_10_2015	NomSao	1	tidal	183.4	12.2294	100.005
69	8_10_2015	NomSao	1	tidal	158.2	12.2294	100.005
70	8_10_2015	NomSao	1	tidal	42.6	12.2294	100.005
71	8_10_2015	NomSao	1	tidal	14.2	12.2294	100.005
72	8_10_2015	NomSao	1	tidal	333	12.2294	100.005
73	8_10_2015	NomSao	1	tidal	885.9	12.2294	100.005
74	8_10_2015	NomSao	1	tidal	58.3	12.2294	100.005
75	8_10_2015	NomSao	1	tidal	236.7	12.2294	100.005
76	8_10_2015	NomSao	1	tidal	23.3	12.2294	100.005
77	8_10_2015	NomSao	1	tidal	26.1	12.2294	100.005
78	8_10_2015	NomSao	1	tidal	30.4	12.2294	100.005
79	8_10_2015	NomSao	1	tidal	17.7	12.2294	100.005
80	8_10_2015	NomSao	1	tidal	49.7	12.2294	100.005
81	8_10_2015	NomSao	1	tidal	20.2	12.2294	100.005
82	8_10_2015	NomSao	1	tidal	47.7	12.2294	100.005
83	8_10_2015	NomSao	1	tidal	31.3	12.2294	100.005
84	8_10_2015	NomSao	1	tidal	39.3	12.2294	100.005
85	8_10_2015	NomSao	1	oyster_bed	137.3	12.2294	100.005
86	8_10_2015	NomSao	1	oyster_bed	36.3	12.2294	100.005
87	8_10_2015	NomSao	1	oyster_bed	26.5	12.2294	100.005
88	8_10_2015	NomSao	1	oyster_bed	296.8	12.2294	100.005
89	8_10_2015	NomSao	1	oyster_bed	85.5	12.2294	100.005
90	8_10_2015	NomSao	1	oyster_bed	246.5	12.2294	100.005
91	8_10_2015	NomSao	1	oyster_bed	84.2	12.2294	100.005
92	8_10_2015	NomSao	6	tidal	544.7	12.2293	100.005
93	8_10_2015	NomSao	6	tidal	79.9	12.2293	100.005
94	8_10_2015	NomSao	6	tidal	63.7	12.2293	100.005
95	8_10_2015	NomSao	6	tidal	94	12.2293	100.005
96	8_10_2015	NomSao	6	tidal	182.3	12.2293	100.005
97	8_10_2015	NomSao	6	tidal	255	12.2293	100.005
98	8_10_2015	NomSao	6	tidal	53.3	12.2293	100.005
99	8_10_2015	NomSao	6	tidal	12.3	12.2293	100.005
100	8_10_2015	NomSao	6	tidal	75	12.2293	100.005
101	8_10_2015	NomSao	6	tidal	244	12.2293	100.005
102	8_10_2015	NomSao	6	tidal	48.4	12.2293	100.005
103	8_10_2015	NomSao	6	tidal	14.2	12.2293	100.005
104	8_10_2015	NomSao	6	tidal	12.9	12.2293	100.005
105	8_10_2015	NomSao	6	oyster_bed	32.8	12.2293	100.005
106	8_10_2015	NomSao	6	oyster_bed	182.9	12.2293	100.005
107	8_10_2015	NomSao	6	oyster_bed	161.5	12.2293	100.005
108	8_10_2015	NomSao	6	oyster_bed	599.3	12.2293	100.005
109	8_10_2015	NomSao	6	oyster_bed	495.7	12.2293	100.005
110	8_10_2015	NomSao	6	oyster_bed	95.8	12.2293	100.005
111	8_10_2015	NomSao	6	oyster_bed	71.6	12.2293	100.005
112	8_10_2015	NomSao	6	oyster_bed	167.8	12.2293	100.005
113	8_10_2015	NomSao	6	oyster_bed	102.2	12.2293	100.005
114	8_10_2015	NomSao	6	oyster_bed	214.9	12.2293	100.005
115	8_10_2015	NomSao	6	oyster_bed	39.7	12.2293	100.005
116	8_10_2015	NomSao	5	tidal	33.5	12.2325	100.005
117	8_10_2015	NomSao	5	tidal	27.1	12.2325	100.005
118	8_10_2015	NomSao	5	tidal	29.9	12.2325	100.005
119	8_10_2015	NomSao	5	tidal	35.4	12.2325	100.005
120	8_10_2015	NomSao	5	tidal	105.4	12.2325	100.005
121	8_10_2015	NomSao	5	tidal	20.9	12.2325	100.005
122	8_10_2015	NomSao	5	tidal	377.8	12.2325	100.005
123	8_10_2015	NomSao	5	tidal	56.7	12.2325	100.005
124	8_10_2015	NomSao	5	tidal	55	12.2325	100.005
125	8_10_2015	NomSao	5	tidal	22.6	12.2325	100.005
126	8_10_2015	NomSao	5	tidal	14.4	12.2325	100.005
127	8_10_2015	NomSao	5	tidal	33.2	12.2325	100.005
128	8_10_2015	NomSao	5	oyster_bed	61.4	12.2325	100.005
129	8_10_2015	NomSao	5	oyster_bed	27	12.2325	100.005
130	8_10_2015	NomSao	5	oyster_bed	71	12.2325	100.005
131	8_10_2015	NomSao	5	oyster_bed	30.2	12.2325	100.005
132	8_10_2015	NomSao	5	oyster_bed	194.3	12.2325	100.005
133	8_10_2015	NomSao	4	tidal	94.8	12.2323	100.004
134	8_10_2015	NomSao	4	tidal	390.2	12.2323	100.004
135	8_10_2015	NomSao	4	tidal	251.6	12.2323	100.004
136	8_10_2015	NomSao	4	tidal	61.5	12.2323	100.004
137	8_10_2015	NomSao	4	tidal	882.4	12.2323	100.004
138	8_10_2015	NomSao	4	tidal	38.5	12.2323	100.004
139	8_10_2015	NomSao	4	tidal	15.1	12.2323	100.004
140	8_10_2015	NomSao	4	tidal	80.1	12.2323	100.004
141	8_10_2015	NomSao	4	tidal	18.3	12.2323	100.004
142	8_10_2015	NomSao	4	tidal	20.5	12.2323	100.004
143	8_10_2015	NomSao	4	oyster_bed	98.8	12.2323	100.004
144	8_10_2015	NomSao	4	oyster_bed	152.8	12.2323	100.004
145	8_10_2015	NomSao	4	oyster_bed	68.1	12.2323	100.004
146	8_10_2015	NomSao	4	oyster_bed	137.1	12.2323	100.004
147	8_10_2015	NomSao	4	oyster_bed	40.2	12.2323	100.004
148	8_10_2015	NomSao	4	oyster_bed	27.8	12.2323	100.004
149	8_10_2015	NomSao	4	oyster_bed	22.6	12.2323	100.004
150	8_10_2015	NomSao	4	oyster_bed	18.3	12.2323	100.004
151	8_10_2015	NomSao	7	tidal	120	12.2327	100.005
152	8_10_2015	NomSao	7	tidal	269.5	12.2327	100.005
153	8_10_2015	NomSao	7	tidal	111.2	12.2327	100.005
154	8_10_2015	NomSao	7	tidal	136.4	12.2327	100.005
155	8_10_2015	NomSao	7	tidal	54.6	12.2327	100.005
156	8_10_2015	NomSao	7	tidal	40.1	12.2327	100.005
157	8_10_2015	NomSao	7	tidal	35	12.2327	100.005
158	8_10_2015	NomSao	7	tidal	137.5	12.2327	100.005
159	8_10_2015	NomSao	7	tidal	84.5	12.2327	100.005
160	8_10_2015	NomSao	7	tidal	51.1	12.2327	100.005
161	8_10_2015	NomSao	7	tidal	97.1	12.2327	100.005
162	8_10_2015	NomSao	7	tidal	920	12.2327	100.005
163	8_10_2015	NomSao	7	tidal	171.3	12.2327	100.005
164	8_10_2015	NomSao	7	tidal	271.4	12.2327	100.005
165	8_10_2015	NomSao	7	tidal	59.1	12.2327	100.005
166	9_10_2015	NomSao	7	oyster_bed	96.7	12.2327	100.005
167	9_10_2015	NomSao	7	oyster_bed	333.5	12.2327	100.005
168	9_10_2015	NomSao	7	oyster_bed	40	12.2327	100.005
169	9_10_2015	NomSao	7	oyster_bed	42.1	12.2327	100.005
170	9_10_2015	NomSao	7	oyster_bed	42.9	12.2327	100.005
171	9_10_2015	NomSao	7	oyster_bed	29.8	12.2327	100.005
172	9_10_2015	NomSao	7	oyster_bed	51.7	12.2327	100.005
173	9_10_2015	NomSao	3	tidal	153.4	12.2312	100.004
174	9_10_2015	NomSao	3	tidal	279.2	12.2312	100.004
175	9_10_2015	NomSao	3	tidal	29.4	12.2312	100.004
176	9_10_2015	NomSao	3	tidal	327.6	12.2312	100.004
177	9_10_2015	NomSao	3	tidal	96.3	12.2312	100.004
178	9_10_2015	NomSao	3	tidal	38.1	12.2312	100.004
179	9_10_2015	NomSao	3	oyster_bed	75.9	12.2312	100.004
180	9_10_2015	NomSao	3	oyster_bed	86	12.2312	100.004
181	9_10_2015	NomSao	3	oyster_bed	30.3	12.2312	100.004
182	9_10_2015	NomSao	3	oyster_bed	40.3	12.2312	100.004
183	9_10_2015	NomSao	3	oyster_bed	68.9	12.2312	100.004
184	9_10_2015	NomSao	3	oyster_bed	156	12.2312	100.004
185	9_10_2015	Koram	8	tidal	460.8	12.2394	100.007
186	9_10_2015	Koram	8	tidal	597.1	12.2394	100.007
187	9_10_2015	Koram	8	tidal	1150.5	12.2394	100.007
188	9_10_2015	Koram	8	oyster_bed	229.4	12.2394	100.007
189	9_10_2015	Koram	8	oyster_bed	160.3	12.2394	100.007
190	9_10_2015	Koram	8	oyster_bed	411.2	12.2394	100.007
191	9_10_2015	Koram	8	oyster_bed	359.9	12.2394	100.007
192	9_10_2015	Koram	9	tidal	68.1	12.2405	100.007
193	9_10_2015	Koram	9	tidal	23.7	12.2405	100.007
194	9_10_2015	Koram	9	tidal	72.7	12.2405	100.007
195	9_10_2015	Koram	9	tidal	32.4	12.2405	100.007
196	9_10_2015	Koram	9	tidal	1243.2	12.2405	100.007
197	9_10_2015	Koram	9	oyster_bed	70.6	12.2405	100.007
198	9_10_2015	Koram	9	oyster_bed	24.8	12.2405	100.007
199	9_10_2015	Koram	9	oyster_bed	26.5	12.2405	100.007
200	9_10_2015	Koram	9	oyster_bed	24.3	12.2405	100.007
201	9_10_2015	Koram	9	oyster_bed	36.4	12.2405	100.007
202	9_10_2015	Koram	9	oyster_bed	19.2	12.2405	100.007
203	9_10_2015	Koram	9	oyster_bed	98.5	12.2405	100.007
204	9_10_2015	Koram	9	oyster_bed	68.7	12.2405	100.007
205	9_10_2015	Koram	9	oyster_bed	121.5	12.2405	100.007
206	9_10_2015	Koram	9	oyster_bed	45	12.2405	100.007
207	9_10_2015	Koram	9	oyster_bed	60.3	12.2405	100.007
208	9_10_2015	Koram	9	oyster_bed	75.2	12.2405	100.007
209	9_10_2015	Koram	9	oyster_bed	296.2	12.2405	100.007
210	9_10_2015	Koram	9	oyster_bed	494.5	12.2405	100.007
211	9_10_2015	Koram	9	oyster_bed	25.4	12.2405	100.007
212	9_10_2015	Koram	10	tidal	34.5	12.2416	100.007
213	9_10_2015	Koram	10	tidal	140.7	12.2416	100.007
214	9_10_2015	Koram	10	oyster_bed	309.3	12.2416	100.007
215	9_10_2015	Koram	10	oyster_bed	393.6	12.2416	100.007
216	9_10_2015	Koram	10	oyster_bed	87.1	12.2416	100.007
217	9_10_2015	Koram	10	oyster_bed	431.8	12.2416	100.007
218	9_10_2015	Koram	10	oyster_bed	168.9	12.2416	100.007
219	9_10_2015	Koram	10	oyster_bed	258.1	12.2416	100.007
220	9_10_2015	Koram	10	oyster_bed	54.6	12.2416	100.007
221	9_10_2015	Koram	10	oyster_bed	64.4	12.2416	100.007
222	9_10_2015	Koram	10	oyster_bed	83.1	12.2416	100.007
223	9_10_2015	Koram	10	oyster_bed	137	12.2416	100.007
224	9_10_2015	Koram	10	oyster_bed	21.7	12.2416	100.007
225	9_10_2015	Koram	10	oyster_bed	829.4	12.2416	100.007
226	9_10_2015	Koram	10	oyster_bed	21.5	12.2416	100.007
227	9_10_2015	Koram	11	tidal	140.7	12.2382	100.006
228	9_10_2015	Koram	11	tidal	24.6	12.2382	100.006
229	9_10_2015	Koram	11	tidal	64.6	12.2382	100.006
230	9_10_2015	Koram	11	tidal	36.5	12.2382	100.006
231	9_10_2015	Koram	11	tidal	395.3	12.2382	100.006
232	9_10_2015	Koram	11	tidal	23.3	12.2382	100.006
233	9_10_2015	Koram	11	tidal	66.5	12.2382	100.006
234	9_10_2015	Koram	11	tidal	109.1	12.2382	100.006
235	9_10_2015	Koram	11	tidal	40.3	12.2382	100.006
236	9_10_2015	Koram	11	tidal	47.5	12.2382	100.006
237	9_10_2015	Koram	11	tidal	19.7	12.2382	100.006
238	9_10_2015	Koram	11	oyster_bed	50.5	12.2382	100.006
239	9_10_2015	Koram	11	oyster_bed	129	12.2382	100.006
240	9_10_2015	Koram	11	oyster_bed	77.3	12.2382	100.006
241	9_10_2015	Koram	11	oyster_bed	118.4	12.2382	100.006
242	9_10_2015	Koram	12	tidal	0	12.2356	100.007
243	9_10_2015	Koram	12	oyster_bed	46.6	12.2356	100.007
244	9_10_2015	Koram	12	oyster_bed	103.3	12.2356	100.007
245	9_10_2015	Koram	12	oyster_bed	43.4	12.2356	100.007
246	9_10_2015	Koram	12	oyster_bed	49.8	12.2356	100.007
247	9_10_2015	Koram	12	oyster_bed	68.8	12.2356	100.007
248	9_10_2015	Koram	12	oyster_bed	44.2	12.2356	100.007
249	9_10_2015	Koram	12	oyster_bed	68.3	12.2356	100.007
250	9_10_2015	Koram	12	oyster_bed	60.1	12.2356	100.007
251	9_10_2015	Koram	12	oyster_bed	56.6	12.2356	100.007
252	9_10_2015	Koram	12	oyster_bed	56.3	12.2356	100.007
253	9_10_2015	Koram	12	oyster_bed	170.6	12.2356	100.007
254	9_10_2015	Koram	12	oyster_bed	200.5	12.2356	100.007
255	9_10_2015	Koram	12	oyster_bed	29.3	12.2356	100.007
256	9_10_2015	Koram	12	oyster_bed	41.8	12.2356	100.007
257	9_10_2015	Koram	12	oyster_bed	26.9	12.2356	100.007
258	9_10_2015	Koram	12	oyster_bed	35.5	12.2356	100.007
259	10_10_2015	Koram	13	tidal	31.8	12.2366	100.006
260	10_10_2015	Koram	13	tidal	11.9	12.2366	100.006
261	10_10_2015	Koram	13	tidal	34	12.2366	100.006
262	10_10_2015	Koram	13	tidal	29	12.2366	100.006
263	10_10_2015	Koram	13	tidal	30.3	12.2366	100.006
264	10_10_2015	Koram	13	tidal	23.3	12.2366	100.006
265	10_10_2015	Koram	13	tidal	27.9	12.2366	100.006
266	10_10_2015	Koram	13	tidal	23.3	12.2366	100.006
267	10_10_2015	Koram	13	tidal	32.3	12.2366	100.006
268	10_10_2015	Koram	13	tidal	34.3	12.2366	100.006
269	10_10_2015	Koram	13	tidal	11.5	12.2366	100.006
270	10_10_2015	Koram	13	oyster_bed	91.7	12.2366	100.006
271	10_10_2015	Koram	13	oyster_bed	536.2	12.2366	100.006
272	10_10_2015	Koram	13	oyster_bed	141.5	12.2366	100.006
273	10_10_2015	Koram	13	oyster_bed	136.9	12.2366	100.006
274	10_10_2015	Koram	13	oyster_bed	27.7	12.2366	100.006
275	10_10_2015	Koram	13	oyster_bed	73.6	12.2366	100.006
276	10_10_2015	Koram	13	oyster_bed	40.1	12.2366	100.006
277	10_10_2015	Koram	13	oyster_bed	36.9	12.2366	100.006
278	10_10_2015	Koram	13	oyster_bed	32.3	12.2366	100.006
279	10_10_2015	Koram	13	oyster_bed	37.6	12.2366	100.006
280	10_10_2015	Koram	13	oyster_bed	10.2	12.2366	100.006
281	10_10_2015	Koram	13	oyster_bed	93.7	12.2366	100.006
282	10_10_2015	Koram	13	oyster_bed	28.7	12.2366	100.006
283	10_10_2015	Koram	13	oyster_bed	26.7	12.2366	100.006
284	10_10_2015	Koram	13	oyster_bed	17.8	12.2366	100.006
285	10_10_2015	Koram	13	oyster_bed	18.4	12.2366	100.006
286	10_10_2015	Koram	13	oyster_bed	19.7	12.2366	100.006
287	10_10_2015	Koram	13	oyster_bed	31.7	12.2366	100.006
288	10_10_2015	Koram	13	oyster_bed	12.2	12.2366	100.006
289	10_10_2015	Koram	14	tidal	135.8	12.2361	100.006
290	10_10_2015	Koram	14	tidal	135.6	12.2361	100.006
291	10_10_2015	Koram	14	tidal	124.4	12.2361	100.006
292	10_10_2015	Koram	14	tidal	83.4	12.2361	100.006
293	10_10_2015	Koram	14	tidal	96	12.2361	100.006
294	10_10_2015	Koram	14	tidal	114.6	12.2361	100.006
295	10_10_2015	Koram	14	tidal	81.1	12.2361	100.006
296	10_10_2015	Koram	14	tidal	86.2	12.2361	100.006
297	10_10_2015	Koram	14	tidal	26	12.2361	100.006
298	10_10_2015	Koram	14	tidal	34.5	12.2361	100.006
299	10_10_2015	Koram	14	tidal	45.7	12.2361	100.006
300	10_10_2015	Koram	14	tidal	30.4	12.2361	100.006
301	10_10_2015	Koram	14	tidal	22.2	12.2361	100.006
302	10_10_2015	Koram	14	tidal	41.2	12.2361	100.006
303	10_10_2015	Koram	14	tidal	55.3	12.2361	100.006
304	10_10_2015	Koram	14	tidal	17.7	12.2361	100.006
305	10_10_2015	Koram	14	tidal	45.3	12.2361	100.006
306	10_10_2015	Koram	14	oyster_bed	420.4	12.2361	100.006
307	10_10_2015	Koram	14	oyster_bed	60.6	12.2361	100.006
308	10_10_2015	Koram	14	oyster_bed	94.5	12.2361	100.006
309	10_10_2015	Koram	14	oyster_bed	27.4	12.2361	100.006
310	10_10_2015	Koram	14	oyster_bed	89.3	12.2361	100.006
311	10_10_2015	Koram	14	oyster_bed	35.4	12.2361	100.006
312	10_10_2015	Koram	14	oyster_bed	369.1	12.2361	100.006
313	10_10_2015	Koram	14	oyster_bed	26.1	12.2361	100.006
314	10_10_2015	Koram	14	oyster_bed	22.8	12.2361	100.006
315	10_10_2015	Koram	14	oyster_bed	1682.5	12.2361	100.006
316	20_10_2015	Koram	15	tidal	106.8	12.2422	100.007
317	20_10_2015	Koram	15	tidal	417.9	12.2422	100.007
318	20_10_2015	Koram	15	tidal	152.6	12.2422	100.007
319	20_10_2015	Koram	15	tidal	63.5	12.2422	100.007
320	20_10_2015	Koram	15	tidal	1107.4	12.2422	100.007
321	20_10_2015	Koram	15	oyster_bed	648.5	12.2422	100.007
322	20_10_2015	Koram	15	oyster_bed	337.4	12.2422	100.007
323	20_10_2015	Koram	15	oyster_bed	812.3	12.2422	100.007
324	20_10_2015	Koram	15	oyster_bed	38.1	12.2422	100.007
325	20_10_2015	Koram	15	oyster_bed	26.7	12.2422	100.007
326	20_10_2015	Koram	15	oyster_bed	27.9	12.2422	100.007
327	20_10_2015	Koram	16	tidal	0	12.2428	100.008
328	20_10_2015	Koram	16	oyster_bed	114.9	12.2428	100.008
329	20_10_2015	Koram	16	oyster_bed	266.1	12.2428	100.008
330	20_10_2015	Koram	16	oyster_bed	132.6	12.2428	100.008
331	20_10_2015	Koram	16	oyster_bed	24.9	12.2428	100.008
332	20_10_2015	Koram	16	oyster_bed	50.4	12.2428	100.008
333	20_10_2015	Koram	16	oyster_bed	41.2	12.2428	100.008
334	20_10_2015	Koram	16	oyster_bed	20.6	12.2428	100.008
335	20_10_2015	Koram	17	tidal	170.6	12.2425	100.008
336	20_10_2015	Koram	17	tidal	144.6	12.2425	100.008
337	20_10_2015	Koram	17	tidal	238.5	12.2425	100.008
338	20_10_2015	Koram	17	tidal	67.2	12.2425	100.008
339	20_10_2015	Koram	17	tidal	166.8	12.2425	100.008
340	20_10_2015	Koram	17	tidal	85.9	12.2425	100.008
341	20_10_2015	Koram	17	tidal	159.9	12.2425	100.008
342	20_10_2015	Koram	17	tidal	264.3	12.2425	100.008
343	20_10_2015	Koram	17	tidal	297.4	12.2425	100.008
344	20_10_2015	Koram	17	tidal	120.3	12.2425	100.008
345	20_10_2015	Koram	17	tidal	367.7	12.2425	100.008
346	20_10_2015	Koram	17	tidal	733.5	12.2425	100.008
347	20_10_2015	Koram	17	oyster_bed	251.1	12.2425	100.008
348	20_10_2015	Koram	17	oyster_bed	391.2	12.2425	100.008
349	20_10_2015	Koram	17	oyster_bed	156.1	12.2425	100.008
350	21_10_2015	NomSao	30	tidal	45.1	12.2323	100.004
351	21_10_2015	NomSao	30	tidal	52.2	12.2323	100.004
352	21_10_2015	NomSao	30	tidal	46	12.2323	100.004
353	21_10_2015	NomSao	30	tidal	46.2	12.2323	100.004
354	21_10_2015	NomSao	30	tidal	56.6	12.2323	100.004
355	21_10_2015	NomSao	30	tidal	41.4	12.2323	100.004
356	21_10_2015	NomSao	30	tidal	54.4	12.2323	100.004
357	21_10_2015	NomSao	30	tidal	49.7	12.2323	100.004
358	21_10_2015	NomSao	30	tidal	136.3	12.2323	100.004
359	21_10_2015	NomSao	30	tidal	249.7	12.2323	100.004
360	21_10_2015	NomSao	30	tidal	287.1	12.2323	100.004
361	21_10_2015	NomSao	30	tidal	367.7	12.2323	100.004
362	21_10_2015	Koram	18	oyster_bed	172	12.2418	100.007
363	22_10_2015	Koram	18	oyster_bed	195.7	12.2418	100.007
364	22_10_2015	Koram	18	oyster_bed	84.6	12.2418	100.007
365	22_10_2015	Koram	18	oyster_bed	118	12.2418	100.007
366	22_10_2015	Koram	18	oyster_bed	282.3	12.2418	100.007
367	22_10_2015	Koram	18	oyster_bed	43.9	12.2418	100.007
368	22_10_2015	Koram	18	oyster_bed	321.1	12.2418	100.007
369	22_10_2015	Koram	18	oyster_bed	106.1	12.2418	100.007
370	22_10_2015	Koram	18	oyster_bed	75.3	12.2418	100.007
371	22_10_2015	Koram	18	oyster_bed	148.1	12.2418	100.007
372	22_10_2015	Koram	18	oyster_bed	166.3	12.2418	100.007
373	22_10_2015	Koram	18	oyster_bed	31.7	12.2418	100.007
374	22_10_2015	Koram	18	oyster_bed	22.4	12.2418	100.007
375	22_10_2015	Koram	18	oyster_bed	33.8	12.2418	100.007
376	22_10_2015	Koram	18	oyster_bed	39.6	12.2418	100.007
377	22_10_2015	Koram	18	oyster_bed	96.2	12.2418	100.007
378	22_10_2015	Koram	18	oyster_bed	34.2	12.2418	100.007
379	22_10_2015	Koram	18	tidal	181.5	12.2418	100.007
380	22_10_2015	Koram	18	tidal	263.9	12.2418	100.007
381	22_10_2015	Koram	18	tidal	121.5	12.2418	100.007
382	22_10_2015	Koram	18	tidal	64.8	12.2418	100.007
383	22_10_2015	Koram	18	tidal	184	12.2418	100.007
384	22_10_2015	Koram	18	tidal	74.8	12.2418	100.007
385	22_10_2015	Koram	18	tidal	62.3	12.2418	100.007
386	22_10_2015	Koram	18	tidal	76.4	12.2418	100.007
387	22_10_2015	Koram	18	tidal	25.1	12.2418	100.007
388	22_10_2015	Koram	18	tidal	139.7	12.2418	100.007
389	22_10_2015	Koram	18	tidal	41.9	12.2418	100.007
390	22_10_2015	Koram	18	tidal	222.6	12.2418	100.007
391	22_10_2015	Koram	18	tidal	63.9	12.2418	100.007
392	22_10_2015	Koram	18	tidal	28.5	12.2418	100.007
393	22_10_2015	Koram	18	tidal	49.5	12.2418	100.007
394	22_10_2015	Koram	18	tidal	235.6	12.2418	100.007
395	22_10_2015	Koram	18	tidal	101.3	12.2418	100.007
396	22_10_2015	Koram	18	tidal	44.6	12.2418	100.007
397	22_10_2015	Koram	18	tidal	133	12.2418	100.007
398	22_10_2015	Koram	18	tidal	296.4	12.2418	100.007
399	22_10_2015	Koram	18	tidal	33.8	12.2418	100.007
400	22_10_2015	Koram	18	tidal	80.7	12.2418	100.007
401	22_10_2015	Koram	18	tidal	386	12.2418	100.007
402	22_10_2015	Koram	18	tidal	509.7	12.2418	100.007
403	22_10_2015	Koram	18	tidal	104.9	12.2418	100.007
404	22_10_2015	Koram	18	tidal	287.6	12.2418	100.007
405	22_10_2015	Koram	18	tidal	72	12.2418	100.007
406	22_10_2015	Koram	19	oyster_bed	172.4	12.2399	100.007
407	22_10_2015	Koram	19	oyster_bed	185.5	12.2399	100.007
408	22_10_2015	Koram	19	oyster_bed	403.1	12.2399	100.007
409	22_10_2015	Koram	19	oyster_bed	38.5	12.2399	100.007
410	22_10_2015	Koram	19	oyster_bed	313.5	12.2399	100.007
411	22_10_2015	Koram	19	oyster_bed	32.5	12.2399	100.007
412	22_10_2015	Koram	19	oyster_bed	114.9	12.2399	100.007
413	22_10_2015	Koram	19	oyster_bed	57.1	12.2399	100.007
414	22_10_2015	Koram	19	oyster_bed	552.2	12.2399	100.007
415	22_10_2015	Koram	19	oyster_bed	31.4	12.2399	100.007
416	22_10_2015	Koram	19	oyster_bed	22.9	12.2399	100.007
417	22_10_2015	Koram	19	oyster_bed	21.1	12.2399	100.007
418	22_10_2015	Koram	19	oyster_bed	50.5	12.2399	100.007
419	22_10_2015	Koram	19	oyster_bed	37	12.2399	100.007
420	22_10_2015	Koram	19	oyster_bed	21	12.2399	100.007
421	22_10_2015	Koram	19	oyster_bed	18.5	12.2399	100.007
422	22_10_2015	Koram	19	tidal	121.4	12.2399	100.007
423	22_10_2015	Koram	19	tidal	83.7	12.2399	100.007
424	22_10_2015	Koram	19	tidal	411.6	12.2399	100.007
425	22_10_2015	Koram	19	tidal	136.5	12.2399	100.007
426	23_10_2015	Koram	20	oyster_bed	92.6	12.2364	100.006
427	23_10_2015	Koram	20	oyster_bed	43.7	12.2364	100.006
428	23_10_2015	Koram	20	oyster_bed	41.1	12.2364	100.006
429	23_10_2015	Koram	20	oyster_bed	47.9	12.2364	100.006
430	23_10_2015	Koram	20	oyster_bed	52	12.2364	100.006
431	23_10_2015	Koram	20	oyster_bed	224.3	12.2364	100.006
432	23_10_2015	Koram	20	oyster_bed	35	12.2364	100.006
433	23_10_2015	Koram	20	oyster_bed	24.4	12.2364	100.006
434	23_10_2015	Koram	20	oyster_bed	27.8	12.2364	100.006
435	23_10_2015	Koram	20	oyster_bed	231.9	12.2364	100.006
436	23_10_2015	Koram	20	tidal	76.4	12.2364	100.006
437	23_10_2015	Koram	20	tidal	109.7	12.2364	100.006
438	23_10_2015	Koram	20	tidal	22.6	12.2364	100.006
439	23_10_2015	Koram	20	tidal	14.9	12.2364	100.006
440	23_10_2015	Koram	20	tidal	864.7	12.2364	100.006
441	23_10_2015	Koram	21	oyster_bed	22	12.2369	100.006
442	23_10_2015	Koram	21	oyster_bed	37.6	12.2369	100.006
443	23_10_2015	Koram	21	tidal	49.7	12.2369	100.006
444	23_10_2015	Koram	21	tidal	44.4	12.2369	100.006
445	23_10_2015	Koram	21	tidal	103.6	12.2369	100.006
446	23_10_2015	Koram	21	tidal	71.1	12.2369	100.006
447	23_10_2015	Koram	21	tidal	34.8	12.2369	100.006
448	23_10_2015	Koram	21	tidal	14.5	12.2369	100.006
449	23_10_2015	Koram	21	tidal	177.9	12.2369	100.006
450	23_10_2015	Koram	21	tidal	22.7	12.2369	100.006
451	23_10_2015	Koram	21	tidal	122.1	12.2369	100.006
452	23_10_2015	Koram	21	tidal	143.1	12.2369	100.006
453	23_10_2015	Koram	21	tidal	17.7	12.2369	100.006
454	23_10_2015	NomSao	31	tidal	360.5	12.2325	100.006
455	23_10_2015	NomSao	31	tidal	286.8	12.2325	100.006
456	23_10_2015	NomSao	31	tidal	135.5	12.2325	100.006
457	23_10_2015	NomSao	31	tidal	208.7	12.2325	100.006
458	23_10_2015	NomSao	31	tidal	65.8	12.2325	100.006
459	23_10_2015	NomSao	31	tidal	54.3	12.2325	100.006
460	23_10_2015	NomSao	31	tidal	99.8	12.2325	100.006
461	23_10_2015	NomSao	31	tidal	111.8	12.2325	100.006
462	23_10_2015	NomSao	31	tidal	33.8	12.2325	100.006
463	23_10_2015	NomSao	31	tidal	24	12.2325	100.006
464	23_10_2015	NomSao	32	tidal	108.9	12.2326	100.005
465	23_10_2015	NomSao	32	tidal	99.6	12.2326	100.005
466	23_10_2015	NomSao	32	tidal	314.3	12.2326	100.005
467	23_10_2015	NomSao	32	tidal	174.8	12.2326	100.005
468	23_10_2015	NomSao	32	tidal	28.8	12.2326	100.005
469	23_10_2015	NomSao	32	tidal	25.3	12.2326	100.005
470	23_10_2015	NomSao	32	tidal	35.3	12.2326	100.005
471	23_10_2015	NomSao	32	tidal	817.1	12.2326	100.005
472	23_10_2015	NomSao	33	tidal	445.1	12.2325	100.005
473	23_10_2015	NomSao	33	tidal	137.8	12.2325	100.005
474	23_10_2015	NomSao	33	tidal	128.7	12.2325	100.005
475	23_10_2015	NomSao	33	tidal	96.1	12.2325	100.005
476	23_10_2015	NomSao	33	tidal	88.8	12.2325	100.005
477	23_10_2015	NomSao	33	tidal	132.6	12.2325	100.005
478	23_10_2015	NomSao	33	tidal	86.9	12.2325	100.005
479	23_10_2015	NomSao	33	tidal	76.3	12.2325	100.005
480	23_10_2015	NomSao	33	tidal	60.4	12.2325	100.005
481	23_10_2015	NomSao	33	tidal	30.5	12.2325	100.005
482	23_10_2015	NomSao	33	tidal	44.3	12.2325	100.005
483	23_10_2015	NomSao	33	tidal	27.2	12.2325	100.005
484	23_10_2015	NomSao	33	tidal	35.9	12.2325	100.005
485	23_10_2015	NomSao	33	tidal	24.5	12.2325	100.005
486	23_10_2015	NomSao	33	tidal	15.2	12.2325	100.005
487	23_10_2015	NomSao	34	tidal	299.7	12.2294	100.004
488	23_10_2015	NomSao	34	tidal	119.6	12.2294	100.004
489	23_10_2015	NomSao	34	tidal	202.3	12.2294	100.004
490	23_10_2015	NomSao	34	tidal	328.9	12.2294	100.004
491	23_10_2015	NomSao	34	tidal	160.6	12.2294	100.004
492	23_10_2015	NomSao	34	tidal	141.6	12.2294	100.004
493	23_10_2015	NomSao	34	tidal	124	12.2294	100.004
494	23_10_2015	NomSao	34	tidal	46.4	12.2294	100.004
495	23_10_2015	NomSao	34	tidal	51.8	12.2294	100.004
496	23_10_2015	NomSao	34	tidal	61.7	12.2294	100.004
497	23_10_2015	NomSao	34	tidal	66.2	12.2294	100.004
498	23_10_2015	NomSao	34	tidal	56.9	12.2294	100.004
499	23_10_2015	NomSao	34	tidal	80.8	12.2294	100.004
500	23_10_2015	NomSao	34	tidal	38.8	12.2294	100.004
501	23_10_2015	NomSao	34	tidal	37	12.2294	100.004
502	23_10_2015	NomSao	34	tidal	55.3	12.2294	100.004
503	23_10_2015	NomSao	34	tidal	25.7	12.2294	100.004
504	23_10_2015	NomSao	34	tidal	29	12.2294	100.004
505	23_10_2015	NomSao	34	tidal	26.4	12.2294	100.004
506	23_10_2015	NomSao	34	tidal	29.4	12.2294	100.004
507	23_10_2015	NomSao	34	tidal	28	12.2294	100.004
508	24_10_2015	NomSao	30	oyster_bed	124.8	12.2323	100.004
509	24_10_2015	NomSao	30	oyster_bed	69.9	12.2323	100.004
510	24_10_2015	NomSao	30	oyster_bed	83.7	12.2323	100.004
511	24_10_2015	NomSao	30	oyster_bed	50.8	12.2323	100.004
512	24_10_2015	NomSao	30	oyster_bed	43.7	12.2323	100.004
513	24_10_2015	NomSao	30	oyster_bed	48.5	12.2323	100.004
514	24_10_2015	NomSao	30	oyster_bed	426.9	12.2323	100.004
515	24_10_2015	NomSao	30	oyster_bed	201.6	12.2323	100.004
516	24_10_2015	NomSao	30	oyster_bed	342.1	12.2323	100.004
517	24_10_2015	NomSao	30	oyster_bed	384.7	12.2323	100.004
518	24_10_2015	NomSao	31	oyster_bed	136.3	12.2325	100.006
519	24_10_2015	NomSao	31	oyster_bed	32.3	12.2325	100.006
520	24_10_2015	NomSao	31	oyster_bed	106.9	12.2325	100.006
521	24_10_2015	NomSao	31	oyster_bed	33.4	12.2325	100.006
522	24_10_2015	NomSao	31	oyster_bed	18.5	12.2325	100.006
523	24_10_2015	NomSao	32	oyster_bed	148.1	12.2326	100.005
524	24_10_2015	NomSao	32	oyster_bed	54.3	12.2326	100.005
525	24_10_2015	NomSao	32	oyster_bed	15.3	12.2326	100.005
526	24_10_2015	NomSao	32	oyster_bed	52.6	12.2326	100.005
527	24_10_2015	NomSao	32	oyster_bed	138.5	12.2326	100.005
528	24_10_2015	NomSao	32	oyster_bed	100.4	12.2326	100.005
529	24_10_2015	NomSao	32	oyster_bed	33.8	12.2326	100.005
530	24_10_2015	NomSao	32	oyster_bed	60.7	12.2326	100.005
531	24_10_2015	NomSao	32	oyster_bed	82.5	12.2326	100.005
532	24_10_2015	NomSao	32	oyster_bed	20.2	12.2326	100.005
533	24_10_2015	NomSao	33	oyster_bed	55.9	12.2325	100.005
534	24_10_2015	NomSao	33	oyster_bed	39.5	12.2325	100.005
535	24_10_2015	NomSao	33	oyster_bed	183.8	12.2325	100.005
536	24_10_2015	NomSao	33	oyster_bed	38.9	12.2325	100.005
537	24_10_2015	NomSao	33	oyster_bed	179.6	12.2325	100.005
538	24_10_2015	NomSao	33	oyster_bed	412.5	12.2325	100.005
539	24_10_2015	NomSao	33	oyster_bed	952.7	12.2325	100.005
540	24_10_2015	NomSao	34	oyster_bed	243.6	12.2294	100.004
541	24_10_2015	NomSao	34	oyster_bed	107.5	12.2294	100.004
542	24_10_2015	NomSao	34	oyster_bed	159.6	12.2294	100.004
543	24_10_2015	NomSao	34	oyster_bed	223	12.2294	100.004
544	24_10_2015	NomSao	34	oyster_bed	80.7	12.2294	100.004
545	24_10_2015	NomSao	34	oyster_bed	52	12.2294	100.004
546	24_10_2015	NomSao	34	oyster_bed	78.7	12.2294	100.004
547	24_10_2015	NomSao	34	oyster_bed	38.5	12.2294	100.004
548	24_10_2015	NomSao	34	oyster_bed	37.2	12.2294	100.004
549	24_10_2015	NomSao	34	oyster_bed	80	12.2294	100.004
550	24_10_2015	NomSao	34	oyster_bed	76	12.2294	100.004
551	24_10_2015	NomSao	34	oyster_bed	49.9	12.2294	100.004
552	24_10_2015	NomSao	34	oyster_bed	23.5	12.2294	100.004
553	24_10_2015	NomSao	34	oyster_bed	31.2	12.2294	100.004
554	24_10_2015	NomSao	34	oyster_bed	45.1	12.2294	100.004
555	24_10_2015	NomSao	34	oyster_bed	28.6	12.2294	100.004
556	24_10_2015	NomSao	34	oyster_bed	23.2	12.2294	100.004
557	24_10_2015	NomSao	34	oyster_bed	25.6	12.2294	100.004
558	24_10_2015	NomSao	34	oyster_bed	24.4	12.2294	100.004

## Sheet: Mainland
Location	Pictures
Office	CIMG7290 - 7292
House	CIMG7338 - 7340
Canal	CIMG7342 - 7345
