# Supplementary material for: Resource depletion through primate stone technology
Source: eLife. 2017 Sep 8;6:e23647. doi: 10.7554/eLife.23647 (PMC5590808; doi:10.7554/eLife.23647)
Supplement: Figure 4—source data 1. — The number of snails located in point transects along the shore of Koram and NomSao Islands, Thailand. [file elife-23647-fig4-data1.xlsx]

## Sheet: Sheet1
Nr	Population	Plot_Nr	GPS_Lat	GPS_Long	Date	Time	M_labio	C_bifasciatus	P_sulcatus
1	NomSao	1	12.2294	100.004	7_10_2015	08:30:00	2	0	61
2	NomSao	2	12.2296	100.004	7_10_2015	09:30:00	0	0	73
3	NomSao	3	12.2319	100.004	7_10_2015	09:50:00	21	3	47
4	NomSao	4	12.2325	100.005	7_10_2015	09:50:00	1	4	74
5	NomSao	5	12.2324	100.004	10_10_2015	07:00:00	5	0	6
6	NomSao	6	12.2299	100.004	12_10_2015	09:30:00	7	0	0
7	NomSao	7	12.2314	100.004	12_10_2015	10:00:00	4	6	0
8	NomSao	8	12.2324	100.006	12_10_2015	10:30:00	0	0	0
9	NomSao	9	12.2327	100.005	12_10_2015	11:00:00	6	0	11
16	NomSao	10	12.2321	100.004	14_10_2015	10:00:00	4	0	65
17	NomSao	30	12.2316	100.004	20_10_2015	08:00:00	4	5	63
26	NomSao	31	12.2326	100.005	23_10_2015	08:30:00	0	0	31
27	NomSao	32	12.2325	100.005	23_10_2015	08:45:00	1	0	39
28	NomSao	33	12.2294	100.004	23_10_2015	09:15:00	13	4	98
10	Koram	11	12.2393	100.007	13_10_2015	10:30:00	0	23	0
12	Koram	13	12.2363	100.006	14_10_2015	10:00:00	0	2	3
14	Koram	15	12.2356	100.007	14_10_2015	10:30:00	0	0	12
18	Koram	17	12.2411	100.007	20_10_2015	08:00:00	0	4	4
19	Koram	18	12.2421	100.007	21_10_2015	06:00:00	2	7	31
20	Koram	19	12.2428	100.008	21_10_2015	06:30:00	0	0	42
21	Koram	20	12.2426	100.008	21_10_2015	06:50:00	0	0	11
22	Koram	21	12.2418	100.007	21_10_2015	07:10:00	0	1	29
23	Koram	22	12.2414	100.007	21_10_2015	07:30:00	0	11	3
24	Koram	23	12.2364	100.006	22_10_2015	08:00:00	0	0	1
25	Koram	24	12.2367	100.006	22_10_2015	08:30:00	0	0	0
11	Koram12	12	12.2405	100.007	13_10_2015	10:45:00	1	0	31
13	Koram13	14	12.2359	100.006	14_10_2015	10:10:00	0	0	7
15	Koram14	16	12.24	100.007	14_10_2015	11:00:00	1	2	7
