# Supplementary material for: Resource depletion through primate stone technology
Source: eLife. 2017 Sep 8;6:e23647. doi: 10.7554/eLife.23647 (PMC5590808; doi:10.7554/eLife.23647)
Supplement: Figure 5—source data 1. — The size of rock oysters measured in width and length on Koram and NomSao Islands, Thailand. [file elife-23647-fig5-data1.xlsx]

## Sheet: Sheet1
Oyster_Nr	Location	Length	Width	Volume
1	NomSao	56	31	1736
2	NomSao	50	45	2250
3	NomSao	55	44	2420
4	NomSao	48	37	1776
5	NomSao	46	30	1380
6	NomSao	43	31	1333
7	NomSao	54	33	1782
8	NomSao	43	19	817
9	NomSao	27	26	702
10	NomSao	50	35	1750
11	NomSao	55	38	2090
12	NomSao	47	33	1551
13	NomSao	37	32	1184
14	NomSao	51	27	1377
15	NomSao	40	30	1200
16	NomSao	46	27	1242
17	NomSao	35	30	1050
18	NomSao	47	25	1175
19	NomSao	20	15	300
20	NomSao	42	29	1218
21	NomSao	40	20	800
22	NomSao	26	21	546
23	NomSao	27	25	675
24	NomSao	32	30	960
25	NomSao	54	43	2322
26	NomSao	45	37	1665
27	NomSao	56	46	2576
28	NomSao	35	34	1190
29	NomSao	32	28	896
30	NomSao	51	38	1938
31	NomSao	46	31	1426
32	NomSao	43	33	1419
33	NomSao	36	30	1080
34	NomSao	39	30	1170
35	NomSao	42	33	1386
36	NomSao	48	40	1920
37	NomSao	51	27	1377
38	NomSao	33	23	759
39	NomSao	44	29	1276
40	NomSao	45	34	1530
41	NomSao	47	36	1692
42	NomSao	49	43	2107
43	NomSao	39	28	1092
44	NomSao	47	38	1786
45	NomSao	45	36	1620
46	NomSao	45	36	1620
47	NomSao	42	40	1680
48	NomSao	44	28	1232
49	NomSao	40	36	1440
50	NomSao	41	39	1599
51	NomSao	44	35	1540
52	NomSao	43	36	1548
53	NomSao	42	34	1428
54	NomSao	46	31	1426
55	NomSao	47	42	1974
56	NomSao	54	42	2268
57	NomSao	41	36	1476
58	NomSao	45	39	1755
59	NomSao	45	39	1755
60	NomSao	53	41	2173
61	NomSao	53	35	1855
62	NomSao	38	28	1064
63	NomSao	59	50	2950
64	NomSao	56	41	2296
65	NomSao	21	13	273
66	NomSao	16	14	224
67	NomSao	19	17	323
68	NomSao	19	10	190
69	NomSao	15	11	165
70	NomSao	15	11	165
71	NomSao	17	11	187
72	NomSao	15	12	180
73	NomSao	19	15	285
74	NomSao	25	13	325
75	NomSao	14	14	196
76	NomSao	17	13	221
77	NomSao	19	16	304
78	NomSao	16	14	224
79	NomSao	26	21	546
80	NomSao	20	14	280
81	NomSao	16	15	240
82	NomSao	23	15	345
83	NomSao	20	12	240
84	NomSao	15	13	195
85	NomSao	10	8	80
86	NomSao	19	14	266
87	NomSao	20	17	340
88	NomSao	17	14	238
89	NomSao	30	24	720
90	NomSao	14	11	154
91	NomSao	13	10	130
92	NomSao	17	16	272
93	NomSao	14	12	168
94	NomSao	15	12	180
95	NomSao	14	10	140
96	NomSao	15	11	165
97	NomSao	14	9	126
98	NomSao	21	14	294
99	NomSao	9	7	63
100	NomSao	16	14	224
101	NomSao	13	9	117
102	NomSao	14	11	154
103	NomSao	11	9	99
104	NomSao	20	13	260
105	NomSao	22	19	418
106	NomSao	25	18	450
107	NomSao	19	12	228
108	NomSao	17	13	221
109	NomSao	15	12	180
110	NomSao	18	9	162
111	NomSao	20	12	240
112	NomSao	20	15	300
113	NomSao	16	9	144
114	NomSao	16	15	240
115	NomSao	32	18	576
116	NomSao	20	11	220
117	NomSao	22	14	308
118	NomSao	15	11	165
119	NomSao	18	14	252
120	NomSao	15	9	135
121	NomSao	17	13	221
123	NomSao	17	14	238
124	NomSao	23	13	299
125	NomSao	15	11	165
126	NomSao	21	18	378
127	NomSao	22	15	330
128	NomSao	14	10	140
129	NomSao	15	9	135
130	NomSao	11	9	99
131	NomSao	11	8	88
132	NomSao	12	13	156
133	NomSao	18	14	252
134	NomSao	12	9	108
135	NomSao	14	12	168
136	NomSao	16	15	240
152	NomSao	60	45	2700
153	NomSao	49	34	1666
154	NomSao	36	27	972
155	NomSao	40	29	1160
156	NomSao	49	31	1519
157	NomSao	54	45	2430
158	NomSao	50	26	1300
159	NomSao	51	22	1122
160	NomSao	35	30	1050
161	NomSao	45	34	1530
162	NomSao	42	37	1554
163	NomSao	42	38	1596
164	NomSao	54	27	1458
165	NomSao	44	35	1540
166	NomSao	58	44	2552
167	NomSao	43	42	1806
168	NomSao	47	36	1692
169	NomSao	43	30	1290
170	NomSao	49	34	1666
171	NomSao	51	40	2040
172	NomSao	40	31	1240
173	NomSao	48	37	1776
174	NomSao	46	40	1840
175	NomSao	55	44	2420
176	NomSao	48	42	2016
177	NomSao	49	37	1813
178	NomSao	40	31	1240
179	NomSao	49	29	1421
180	NomSao	54	42	2268
181	NomSao	51	31	1581
182	NomSao	47	40	1880
183	NomSao	46	34	1564
184	NomSao	35	30	1050
185	NomSao	34	26	884
190	NomSao	45	25	1125
191	NomSao	44	26	1144
192	NomSao	46	35	1610
193	NomSao	51	35	1785
194	NomSao	56	52	2912
195	NomSao	46	31	1426
196	NomSao	46	27	1242
197	NomSao	33	22	726
198	NomSao	57	31	1767
199	NomSao	49	36	1764
200	NomSao	50	43	2150
201	NomSao	14	12	168
202	NomSao	14	9	126
203	NomSao	9	8	72
204	NomSao	15	7	105
205	NomSao	22	18	396
206	NomSao	25	15	375
207	NomSao	21	13	273
208	NomSao	23	15	345
209	NomSao	18	10	180
210	NomSao	16	15	240
211	NomSao	19	14	266
212	NomSao	17	15	255
213	NomSao	20	14	280
214	NomSao	43	30	1290
215	NomSao	41	35	1435
216	NomSao	63	52	3276
217	NomSao	50	42	2100
218	NomSao	25	16	400
220	NomSao	14	11	154
221	NomSao	15	14	210
222	NomSao	16	11	176
223	NomSao	17	13	221
224	NomSao	14	12	168
225	NomSao	20	12	240
226	NomSao	21	11	231
227	NomSao	16	13	208
228	NomSao	14	10	140
229	NomSao	15	8	120
230	NomSao	10	8	80
231	NomSao	15	10	150
236	NomSao	16	12	192
237	NomSao	13	7	91
238	NomSao	13	12	156
239	NomSao	19	15	285
240	NomSao	19	11	209
242	NomSao	50	42	2100
246	NomSao	51	18	918
247	NomSao	30	21	630
248	NomSao	45	31	1395
249	NomSao	58	48	2784
250	NomSao	59	58	3422
251	NomSao	52	39	2028
252	NomSao	50	39	1950
253	NomSao	48	39	1872
254	NomSao	43	26	1118
255	NomSao	55	46	2530
256	NomSao	45	45	2025
257	NomSao	45	32	1440
258	NomSao	55	41	2255
259	NomSao	45	30	1350
260	NomSao	53	43	2279
261	NomSao	45	42	1890
262	NomSao	39	25	975
263	NomSao	50	41	2050
264	NomSao	50	48	2400
265	NomSao	44	35	1540
266	NomSao	62	53	3286
267	NomSao	57	35	1995
268	NomSao	53	34	1802
269	NomSao	49	25	1225
270	NomSao	48	45	2160
271	NomSao	52	50	2600
272	NomSao	42	35	1470
273	NomSao	48	35	1680
274	NomSao	44	29	1276
275	NomSao	58	40	2320
276	NomSao	46	30	1380
277	NomSao	40	34	1360
278	NomSao	45	31	1395
279	NomSao	49	34	1666
280	NomSao	39	35	1365
281	NomSao	35	44	1540
282	NomSao	60	45	2700
283	NomSao	40	20	800
284	NomSao	40	21	840
285	NomSao	46	32	1472
286	NomSao	50	39	1950
287	NomSao	69	35	2415
288	NomSao	40	34	1360
289	NomSao	47	34	1598
290	NomSao	47	41	1927
291	NomSao	42	25	1050
292	NomSao	44	42	1848
293	NomSao	41	31	1271
294	NomSao	45	35	1575
295	NomSao	46	27	1242
296	NomSao	45	31	1395
297	NomSao	46	37	1702
298	NomSao	41	33	1353
299	NomSao	63	50	3150
300	NomSao	59	40	2360
301	NomSao	53	44	2332
302	NomSao	51	44	2244
303	NomSao	46	40	1840
304	NomSao	52	31	1612
305	NomSao	39	30	1170
306	NomSao	50	31	1550
307	NomSao	39	35	1365
308	NomSao	59	30	1770
309	NomSao	46	40	1840
310	NomSao	53	35	1855
311	NomSao	41	25	1025
312	NomSao	50	36	1800
313	NomSao	51	31	1581
314	NomSao	52	32	1664
315	NomSao	45	40	1800
316	NomSao	49	36	1764
317	NomSao	52	31	1612
318	NomSao	35	33	1155
319	NomSao	41	35	1435
320	NomSao	35	31	1085
321	NomSao	39	16	624
322	NomSao	85	59	5015
323	NomSao	58	41	2378
324	NomSao	70	42	2940
325	NomSao	52	41	2132
326	NomSao	42	40	1680
327	NomSao	41	32	1312
328	NomSao	39	30	1170
329	NomSao	54	43	2322
330	NomSao	62	27	1674
331	NomSao	65	54	3510
332	NomSao	26	20	520
333	NomSao	28	19	532
334	NomSao	26	15	390
335	NomSao	62	30	1860
336	NomSao	68	38	2584
337	NomSao	47	36	1692
338	NomSao	60	34	2040
339	NomSao	70	36	2520
340	NomSao	72	25	1800
341	NomSao	57	36	2052
342	NomSao	42	35	1470
343	NomSao	57	48	2736
344	NomSao	25	15	375
345	NomSao	20	16	320
346	NomSao	20	10	200
347	NomSao	55	42	2310
348	NomSao	30	13	390
349	NomSao	22	13	286
350	NomSao	51	23	1173
351	NomSao	33	24	792
352	NomSao	32	30	960
353	NomSao	50	34	1700
354	NomSao	44	34	1496
355	NomSao	29	24	696
356	NomSao	35	30	1050
357	NomSao	34	22	748
358	NomSao	48	25	1200
359	NomSao	46	25	1150
360	NomSao	48	35	1680
361	NomSao	39	18	702
362	NomSao	46	29	1334
363	NomSao	52	41	2132
364	NomSao	45	39	1755
365	NomSao	47	34	1598
366	NomSao	33	27	891
367	NomSao	42	20	840
368	NomSao	58	39	2262
369	NomSao	55	42	2310
370	NomSao	48	41	1968
371	NomSao	59	48	2832
372	NomSao	53	40	2120
373	NomSao	45	39	1755
374	NomSao	40	27	1080
375	Koram	16	11	176
376	Koram	15	12	180
377	Koram	22	16	352
378	Koram	23	22	506
379	Koram	32	22	704
380	Koram	36	18	648
381	Koram	16	10	160
382	Koram	12	9	108
383	Koram	36	20	720
384	Koram	14	6	84
385	Koram	24	21	504
386	Koram	20	14	280
387	Koram	24	20	480
388	Koram	22	20	440
389	Koram	19	15	285
390	Koram	28	21	588
391	Koram	30	28	840
392	Koram	23	19	437
393	Koram	19	8	152
394	Koram	19	13	247
395	Koram	15	7	105
396	Koram	61	22	1342
397	Koram	25	16	400
398	Koram	42	34	1428
399	Koram	62	36	2232
400	Koram	62	32	1984
401	Koram	50	37	1850
402	Koram	44	25	1100
403	Koram	39	30	1170
404	Koram	58	39	2262
405	Koram	40	30	1200
406	Koram	42	34	1428
407	Koram	33	31	1023
408	Koram	62	44	2728
409	Koram	53	45	2385
410	Koram	43	35	1505
411	Koram	55	46	2530
412	Koram	45	36	1620
413	Koram	42	24	1008
414	Koram	49	31	1519
415	Koram	56	32	1792
416	Koram	20	19	380
417	Koram	42	26	1092
418	Koram	31	29	899
419	Koram	32	29	928
420	Koram	17	16	272
421	Koram	20	15	300
422	Koram	18	12	216
423	Koram	21	17	357
424	Koram	14	9	126
425	Koram	17	15	255
426	Koram	16	11	176
427	Koram	10	8	80
428	Koram	25	20	500
429	Koram	19	13	247
430	Koram	19	14	266
431	Koram	25	15	375
432	Koram	27	18	486
433	Koram	33	24	792
434	Koram	17	10	170
435	Koram	36	26	936
436	Koram	31	25	775
437	Koram	31	20	620
438	Koram	30	20	600
439	Koram	10	7	70
440	Koram	24	10	240
441	Koram	38	35	1330
442	Koram	25	23	575
443	Koram	20	10	200
444	Koram	10	7	70
445	Koram	29	22	638
446	Koram	24	15	360
447	Koram	25	18	450
448	Koram	16	12	192
449	Koram	33	24	792
450	Koram	30	21	630
451	Koram	33	18	594
452	Koram	27	23	621
453	Koram	30	24	720
454	Koram	21	15	315
455	Koram	32	21	672
456	Koram	30	16	480
457	Koram	29	25	725
458	Koram	37	24	888
459	Koram	33	25	825
460	Koram	27	25	675
461	Koram	33	25	825
462	Koram	36	14	504
463	Koram	26	22	572
464	Koram	30	25	750
465	Koram	30	24	720
466	Koram	34	25	850
467	Koram	23	15	345
468	Koram	51	32	1632
469	Koram	46	42	1932
470	Koram	50	39	1950
471	Koram	39	32	1248
472	Koram	46	42	1932
473	Koram	43	28	1204
474	Koram	36	25	900
475	Koram	55	44	2420
476	Koram	55	31	1705
477	Koram	55	42	2310
478	Koram	60	48	2880
479	Koram	66	48	3168
480	Koram	46	36	1656
481	Koram	68	47	3196
482	Koram	59	41	2419
483	Koram	75	53	3975
484	Koram	50	40	2000
485	Koram	52	25	1300
486	Koram	40	29	1160
487	Koram	25	16	400
488	Koram	57	39	2223
489	Koram	19	10	190
490	Koram	15	10	150
491	Koram	45	24	1080
492	Koram	36	23	828
493	Koram	45	38	1710
494	Koram	50	35	1750
495	Koram	43	37	1591
497	Koram	50	35	1750
498	Koram	39	34	1326
499	Koram	46	34	1564
500	Koram	50	31	1550
501	Koram	45	28	1260
502	Koram	41	30	1230
503	Koram	47	27	1269
504	Koram	20	20	400
505	Koram	16	10	160
506	Koram	8	6	48
507	Koram	10	8	80
508	Koram	15	14	210
509	Koram	12	7	84
510	Koram	9	5	45
511	Koram	11	6	66
512	Koram	8	6	48
513	Koram	11	7	77
514	Koram	14	12	168
515	Koram	12	11	132
516	Koram	9	7	63
517	Koram	17	10	170
518	Koram	15	11	165
519	Koram	13	9	117
520	Koram	12	9	108
521	Koram	15	8	120
522	Koram	13	8	104
523	Koram	11	8	88
524	Koram	10	8	80
525	Koram	8	5	40
526	Koram	15	9	135
527	Koram	12	9	108
528	Koram	13	11	143
529	Koram	15	9	135
530	Koram	20	9	180
531	Koram	9	8	72
532	Koram	15	6	90
533	Koram	13	5	65
534	Koram	7	7	49
535	Koram	5	4	20
536	Koram	11	7	77
537	Koram	9	6	54
538	Koram	6	4	24
539	Koram	6	4	24
540	Koram	5	4	20
541	Koram	9	5	45
542	Koram	11	4	44
543	Koram	26	18	468
544	Koram	38	31	1178
545	Koram	40	18	720
546	Koram	20	14	280
547	Koram	39	22	858
548	Koram	46	53	2438
549	Koram	45	34	1530
550	Koram	45	28	1260
551	Koram	44	34	1496
552	Koram	42	26	1092
553	Koram	40	23	920
554	Koram	42	35	1470
555	Koram	45	39	1755
556	Koram	43	29	1247
557	Koram	58	37	2146
558	Koram	53	39	2067
559	Koram	44	35	1540
560	Koram	52	21	1092
561	Koram	48	25	1200
562	Koram	27	15	405
563	Koram	25	17	425
564	Koram	34	25	850
565	Koram	31	21	651
566	Koram	20	12	240
567	Koram	20	10	200
568	Koram	16	12	192
569	Koram	19	15	285
570	Koram	16	14	224
571	Koram	37	28	1036
572	Koram	11	10	110
573	Koram	32	15	480
574	Koram	27	15	405
575	Koram	26	10	260
576	Koram	25	14	350
577	Koram	22	20	440
578	Koram	23	19	437
579	Koram	17	10	170
580	Koram	19	15	285
581	Koram	24	17	408
582	Koram	22	17	374
583	Koram	20	15	300
584	Koram	20	13	260
585	Koram	33	22	726
586	Koram	37	27	999
587	Koram	16	11	176
588	Koram	20	14	280
589	Koram	12	9	108
590	Koram	16	10	160
591	Koram	29	15	435
592	Koram	21	14	294
593	Koram	16	15	240
594	Koram	17	15	255
595	Koram	24	15	360
596	Koram	20	14	280
597	Koram	17	13	221
598	Koram	17	13	221
599	Koram	15	11	165
600	Koram	12	8	96
601	Koram	15	9	135
602	Koram	16	7	112
603	Koram	20	12	240
604	Koram	23	16	368
605	Koram	55	46	2530
606	Koram	22	18	396
607	Koram	19	15	285
608	Koram	19	8	152
609	Koram	15	8	120
610	Koram	22	15	330
611	Koram	19	11	209
612	Koram	19	15	285
613	Koram	21	13	273
614	Koram	11	10	110
615	Koram	12	11	132
616	Koram	27	17	459
617	Koram	24	19	456
618	Koram	21	10	210
619	Koram	26	24	624
620	Koram	45	24	1080
621	Koram	54	43	2322
622	Koram	23	17	391
623	Koram	21	14	294
624	Koram	36	30	1080
625	Koram	42	21	882
626	Koram	15	11	165
627	Koram	21	15	315
628	Koram	40	25	1000
629	Koram	20	14	280
630	Koram	15	10	150
631	Koram	44	25	1100
632	Koram	14	13	182
633	Koram	24	17	408
634	Koram	19	12	228
635	Koram	30	17	510
636	Koram	10	9	90
637	Koram	16	13	208
638	Koram	26	19	494
639	Koram	12	9	108
640	Koram	43	29	1247
641	Koram	54	28	1512
642	Koram	41	35	1435
643	Koram	40	31	1240
644	Koram	24	17	408
645	Koram	19	14	266
646	Koram	21	12	252
647	Koram	17	17	289
648	Koram	21	19	399
649	Koram	59	40	2360
650	Koram	50	26	1300
651	Koram	46	31	1426
652	Koram	34	30	1020
653	Koram	40	30	1200
654	Koram	40	25	1000
655	Koram	35	23	805
656	Koram	37	35	1295
657	Koram	35	25	875
658	Koram	62	40	2480
659	Koram	51	35	1785
660	Koram	46	34	1564
661	Koram	14	11	154
662	Koram	25	14	350
663	Koram	34	14	476
664	Koram	29	20	580
665	Koram	36	27	972
666	Koram	29	18	522
667	Koram	30	19	570
668	Koram	24	20	480
669	Koram	21	10	210
670	Koram	24	15	360
671	Koram	26	15	390
672	Koram	25	21	525
673	Koram	25	15	375
674	Koram	16	14	224
675	Koram	20	10	200
676	Koram	21	15	315
677	Koram	21	9	189
678	Koram	15	11	165
679	Koram	11	6	66
680	Koram	16	9	144
681	Koram	49	38	1862
682	Koram	57	42	2394
683	Koram	48	39	1872
684	Koram	55	42	2310
685	Koram	41	26	1066
686	Koram	40	33	1320
687	Koram	49	33	1617
688	Koram	31	27	837
689	Koram	45	40	1800
690	Koram	32	24	768
691	Koram	47	27	1269
692	Koram	46	33	1518
693	Koram	37	24	888
694	Koram	54	41	2214
695	Koram	35	18	630
696	Koram	61	49	2989
697	Koram	55	35	1925
698	Koram	43	31	1333
699	Koram	53	34	1802
700	Koram	56	35	1960
701	Koram	49	37	1813
702	Koram	41	35	1435
703	Koram	47	34	1598
704	Koram	45	35	1575
705	Koram	36	25	900
706	Koram	37	36	1332
707	Koram	39	32	1248
708	Koram	44	26	1144
709	Koram	48	26	1248
710	Koram	42	25	1050
711	Koram	49	38	1862
712	Koram	45	15	675
713	Koram	50	34	1700
714	Koram	38	20	760
715	Koram	54	36	1944
716	Koram	29	29	841
717	Koram	39	34	1326
718	Koram	27	21	567
719	Koram	37	29	1073
720	Koram	23	14	322
721	Koram	14	9	126
722	Koram	40	31	1240
723	Koram	39	32	1248
724	Koram	30	18	540
725	Koram	32	20	640
726	Koram	29	28	812
727	Koram	21	20	420
728	Koram	38	25	950
729	Koram	29	20	580
730	Koram	39	15	585
731	Koram	34	19	646
732	Koram	33	25	825
733	Koram	30	20	600
734	Koram	29	22	638
735	Koram	26	21	546
736	Koram	29	21	609
737	Koram	30	23	690
738	Koram	21	18	378
739	Koram	27	12	324
740	Koram	51	32	1632
741	Koram	45	31	1395
742	Koram	50	29	1450
743	Koram	63	30	1890
744	Koram	55	27	1485
745	Koram	41	28	1148
746	Koram	43	22	946
747	Koram	53	25	1325
748	Koram	49	30	1470
749	Koram	42	22	924
750	Koram	29	27	783
751	Koram	43	40	1720
752	Koram	41	34	1394
753	Koram	41	19	779
754	Koram	31	28	868
755	Koram	51	26	1326
756	Koram	39	24	936
757	Koram	43	20	860
758	Koram	17	10	170
759	Koram	21	16	336
760	Koram	21	19	399
761	Koram	20	15	300
762	Koram	18	14	252
763	Koram	20	10	200
764	Koram	11	10	110
765	Koram	19	14	266
766	Koram	49	41	2009
767	Koram	24	13	312
768	Koram	49	43	2107
769	Koram	13	8	104
770	Koram	17	14	238
771	Koram	15	11	165
772	Koram	24	17	408
773	Koram	14	10	140
774	Koram	14	12	168
775	Koram	19	13	247
776	Koram	36	39	1404
777	Koram	16	13	208
778	Koram	20	16	320
779	Koram	18	14	252
780	Koram	30	27	810
781	Koram	25	24	600
782	Koram	24	14	336
783	Koram	44	38	1672
784	Koram	17	10	170
785	Koram	19	15	285
786	Koram	16	8	128
787	Koram	17	11	187
788	Koram	15	8	120
789	Koram	24	14	336
790	Koram	16	14	224
791	Koram	24	17	408
792	Koram	17	10	170
793	Koram	16	15	240
794	Koram	19	9	171
795	Koram	19	11	209
796	Koram	14	12	168
797	Koram	15	9	135
798	Koram	16	10	160
799	Koram	19	15	285
800	Koram	20	15	300
801	Koram	10	8	80
802	Koram	18	8	144
803	Koram	16	9	144
804	Koram	20	14	280
805	Koram	18	9	162
806	Koram	22	12	264
807	Koram	13	9	117
808	Koram	22	17	374
809	Koram	20	10	200
810	Koram	19	13	247
811	Koram	17	6	102
812	Koram	15	9	135
813	Koram	9	5	45
814	Koram	12	10	120
815	Koram	20	11	220
816	Koram	13	10	130
817	Koram	15	11	165
818	Koram	15	9	135
819	Koram	25	9	225
820	Koram	18	9	162
821	Koram	16	11	176
822	Koram	20	10	200
823	Koram	15	9	135
824	Koram	41	29	1189
825	Koram	45	30	1350
826	Koram	15	13	195
827	Koram	48	47	2256
828	Koram	57	42	2394
829	Koram	53	30	1590
830	Koram	50	36	1800
831	Koram	40	35	1400
832	Koram	46	40	1840
833	Koram	51	34	1734
834	Koram	35	25	875
835	Koram	49	38	1862
836	Koram	55	43	2365
837	Koram	46	35	1610
838	Koram	38	30	1140
839	Koram	50	38	1900
840	Koram	37	35	1295
841	Koram	54	30	1620
842	Koram	53	27	1431
843	Koram	39	34	1326
844	Koram	31	22	682
845	Koram	20	19	380
846	Koram	22	19	418
847	Koram	18	15	270
848	Koram	22	16	352
849	Koram	20	13	260
850	Koram	16	15	240
851	Koram	18	16	288
852	Koram	25	18	450
853	Koram	19	14	266
854	Koram	40	21	840
855	Koram	11	6	66
856	Koram	19	14	266
857	Koram	20	11	220
858	Koram	11	9	99
859	Koram	11	7	77
860	Koram	31	9	279
861	Koram	10	5	50
862	Koram	20	9	180
863	Koram	17	10	170
864	Koram	15	13	195
865	Koram	15	10	150
866	Koram	25	11	275
867	Koram	15	11	165
868	Koram	12	10	120
869	Koram	17	14	238
870	Koram	24	19	456
871	Koram	14	10	140
872	Koram	23	19	437
873	Koram	10	9	90
874	Koram	14	10	140
875	Koram	19	16	304
876	Koram	15	12	180
877	Koram	9	9	81
878	Koram	18	9	162
879	Koram	21	15	315
880	Koram	15	10	150
881	Koram	11	6	66
882	Koram	25	18	450
883	Koram	16	11	176
884	Koram	21	16	336
885	Koram	13	11	143
886	Koram	21	11	231
887	Koram	16	6	96
888	Koram	10	7	70
889	Koram	37	34	1258
890	Koram	16	14	224
891	Koram	10	9	90
892	Koram	20	15	300
893	Koram	19	16	304
894	Koram	12	9	108
895	Koram	17	9	153
896	Koram	20	11	220
897	Koram	39	32	1248
898	Koram	48	30	1440
899	Koram	37	26	962
900	Koram	42	37	1554
901	Koram	54	43	2322
902	Koram	45	22	990
903	Koram	46	28	1288
904	Koram	54	21	1134
905	Koram	19	16	304
906	Koram	23	11	253
907	Koram	14	8	112
908	Koram	18	12	216
909	Koram	11	10	110
910	Koram	19	11	209
911	Koram	13	11	143
912	Koram	14	13	182
913	Koram	19	15	285
914	Koram	18	12	216
915	Koram	13	10	130
916	Koram	13	9	117
917	Koram	13	10	130
918	Koram	43	29	1247
919	Koram	16	14	224
920	Koram	15	11	165
921	Koram	14	13	182
922	Koram	19	14	266
923	Koram	20	14	280
924	Koram	19	14	266
925	Koram	25	16	400
926	Koram	15	9	135
927	Koram	11	8	88
928	Koram	10	6	60
929	Koram	13	9	117
930	Koram	57	35	1995
931	Koram	42	33	1386
932	Koram	15	14	210
933	Koram	60	40	2400
934	Koram	37	26	962
935	Koram	39	31	1209
936	Koram	52	24	1248
937	Koram	51	38	1938
938	Koram	31	29	899
939	Koram	18	9	162
940	Koram	32	25	800
941	Koram	11	8	88
942	Koram	18	15	270
943	Koram	18	10	180
944	Koram	14	9	126
945	Koram	19	17	323
946	Koram	10	9	90
947	Koram	37	23	851
948	Koram	15	10	150
949	Koram	10	9	90
950	Koram	14	9	126
951	Koram	32	12	384
952	Koram	29	19	551
953	Koram	38	32	1216
954	Koram	50	39	1950
955	Koram	46	34	1564
956	Koram	36	29	1044
957	Koram	44	24	1056
958	Koram	18	14	252
959	Koram	42	30	1260
960	Koram	30	21	630
961	Koram	41	34	1394
962	Koram	10	8	80
963	Koram	55	38	2090
964	Koram	39	28	1092
965	Koram	15	9	135
966	Koram	40	35	1400
967	Koram	38	34	1292
968	Koram	42	28	1176
969	Koram	14	12	168
970	Koram	19	10	190
971	Koram	15	10	150
972	Koram	9	9	81
973	Koram	17	10	170
974	Koram	26	15	390
975	Koram	23	23	529
976	Koram	31	22	682
977	Koram	23	20	460
978	Koram	31	28	868
979	Koram	19	14	266
980	Koram	19	13	247
981	Koram	19	14	266
982	Koram	35	24	840
983	Koram	29	24	696
984	Koram	20	16	320
985	Koram	15	12	180
986	Koram	22	17	374
987	Koram	13	11	143
988	Koram	21	18	378
989	Koram	17	12	204
990	Koram	16	13	208
991	Koram	15	14	210
992	Koram	30	15	450
993	Koram	16	13	208
994	Koram	18	15	270
995	Koram	25	26	650
996	Koram	13	11	143
997	Koram	21	14	294
998	Koram	45	34	1530
999	Koram	15	10	150
1000	Koram	25	17	425
1001	Koram	30	20	600
1002	Koram	39	30	1170
1003	Koram	25	12	300
1004	Koram	13	11	143
1005	Koram	16	15	240
1006	Koram	15	12	180
1007	Koram	12	10	120
1008	Koram	25	17	425
1009	Koram	22	11	242
1010	Koram	15	12	180
1011	Koram	30	22	660
1012	Koram	40	27	1080
1013	Koram	40	24	960
1014	Koram	31	20	620
1015	Koram	28	22	616
1016	Koram	39	22	858
1017	Koram	34	24	816
1018	Koram	35	24	840
1019	Koram	35	25	875
1020	Koram	24	21	504
1021	Koram	45	40	1800
1022	Koram	36	27	972
1023	Koram	39	28	1092
1024	Koram	36	28	1008
1025	Koram	34	29	986
1026	Koram	49	36	1764
1027	Koram	28	24	672
1028	Koram	35	22	770
1029	Koram	29	26	754
1030	Koram	24	17	408
1031	Koram	26	24	624
1032	Koram	29	28	812
1033	Koram	26	25	650
1034	Koram	31	18	558
1035	Koram	23	17	391
1036	Koram	30	20	600
1037	Koram	25	19	475
1038	Koram	31	28	868
1039	Koram	39	20	780
1040	Koram	20	19	380
1041	Koram	23	18	414
1042	Koram	24	20	480
1043	Koram	33	25	825
1044	Koram	35	14	490
1045	Koram	21	19	399
1046	Koram	19	14	266
1047	Koram	30	18	540
1048	Koram	31	21	651
