# Supplementary material for: Resource depletion through primate stone technology
Source: eLife. 2017 Sep 8;6:e23647. doi: 10.7554/eLife.23647 (PMC5590808; doi:10.7554/eLife.23647)
Supplement: Figure 5—source data 2. — The size (length) of three marine snails (N = 100 each) on Koram and NomSao Islands, Thailand. [file elife-23647-fig5-data2.xlsx]

## Sheet: Monkey Island Periwinkles
Shell no.	Date	Location	Species	Length_mm	Width_mm	Weight_g	Volume
1	5_10_2015	Koram	Periwinkles	19	10	1.5	190
2	5_10_2015	Koram	Periwinkles	16	10	1	160
3	5_10_2015	Koram	Periwinkles	15	10	0.9	150
4	5_10_2015	Koram	Periwinkles	15	10	0.8	150
5	5_10_2015	Koram	Periwinkles	14	9	0.7	126
6	5_10_2015	Koram	Periwinkles	13	7	0.6	91
7	5_10_2015	Koram	Periwinkles	12	6	0.5	72
8	5_10_2015	Koram	Periwinkles	13	7	0.5	91
9	5_10_2015	Koram	Periwinkles	14	7	0.6	98
10	5_10_2015	Koram	Periwinkles	15	7	0.7	105
11	5_10_2015	Koram	Periwinkles	17	7	1.1	119
12	5_10_2015	Koram	Periwinkles	14	7	0.6	98
13	5_10_2015	Koram	Periwinkles	15	9	0.9	135
14	5_10_2015	Koram	Periwinkles	12	5	0.5	60
15	5_10_2015	Koram	Periwinkles	14	6	0.8	84
16	5_10_2015	Koram	Periwinkles	13	7	0.5	91
17	5_10_2015	Koram	Periwinkles	14	7	0.6	98
18	5_10_2015	Koram	Periwinkles	12	7	0.5	84
19	5_10_2015	Koram	Periwinkles	15	7	0.9	105
20	5_10_2015	Koram	Periwinkles	14	7	0.7	98
21	5_10_2015	Koram	Periwinkles	13	7	0.7	91
22	5_10_2015	Koram	Periwinkles	15	7	0.9	105
23	5_10_2015	Koram	Periwinkles	15	8	0.8	120
24	5_10_2015	Koram	Periwinkles	10	5	0.2	50
25	5_10_2015	Koram	Periwinkles	11	4	0.2	44
26	5_10_2015	Koram	Periwinkles	16	8	0.9	128
27	5_10_2015	Koram	Periwinkles	12	6	0.4	72
28	5_10_2015	Koram	Periwinkles	15	9	0.9	135
29	5_10_2015	Koram	Periwinkles	14	7	0.6	98
30	5_10_2015	Koram	Periwinkles	12	7	0.6	84
31	5_10_2015	Koram	Periwinkles	13	7	0.6	91
32	5_10_2015	Koram	Periwinkles	11	5	0.3	55
33	5_10_2015	Koram	Periwinkles	11	5	0.2	55
34	5_10_2015	Koram	Periwinkles	12	7	0.6	84
35	5_10_2015	Koram	Periwinkles	15	7	0.6	105
36	5_10_2015	Koram	Periwinkles	13	7	0.6	91
37	5_10_2015	Koram	Periwinkles	14	6	0.6	84
38	5_10_2015	Koram	Periwinkles	12	6	0.5	72
39	5_10_2015	Koram	Periwinkles	14	8	0.7	112
40	5_10_2015	Koram	Periwinkles	15	7	0.8	105
41	5_10_2015	Koram	Periwinkles	15	9	0.9	135
42	5_10_2015	Koram	Periwinkles	15	7	0.8	105
43	5_10_2015	Koram	Periwinkles	15	7	0.8	105
44	5_10_2015	Koram	Periwinkles	13	7	0.6	91
45	5_10_2015	Koram	Periwinkles	15	8	0.8	120
46	5_10_2015	Koram	Periwinkles	16	7	0.9	112
47	5_10_2015	Koram	Periwinkles	15	6	0.7	90
48	5_10_2015	Koram	Periwinkles	14	7	0.7	98
49	5_10_2015	Koram	Periwinkles	10	4	0.3	40
50	5_10_2015	Koram	Periwinkles	9	4	0.1	36
51	5_10_2015	Koram	Periwinkles	14	8	0.6	112
52	5_10_2015	Koram	Periwinkles	12	6	0.4	72
53	5_10_2015	Koram	Periwinkles	15	7	0.6	105
54	5_10_2015	Koram	Periwinkles	13	7	0.4	91
55	5_10_2015	Koram	Periwinkles	14	8	0.5	112
56	5_10_2015	Koram	Periwinkles	13	7	0.6	91
57	5_10_2015	Koram	Periwinkles	12	6	0.5	72
58	5_10_2015	Koram	Periwinkles	14	6	0.6	84
59	5_10_2015	Koram	Periwinkles	14	7	0.6	98
60	5_10_2015	Koram	Periwinkles	14	6	0.5	84
61	5_10_2015	Koram	Periwinkles	12	6	0.4	72
62	5_10_2015	Koram	Periwinkles	13	7	0.5	91
63	5_10_2015	Koram	Periwinkles	12	7	0.5	84
64	5_10_2015	Koram	Periwinkles	15	8	0.8	120
65	5_10_2015	Koram	Periwinkles	12	6	0.5	72
66	5_10_2015	Koram	Periwinkles	14	8	0.7	112
67	5_10_2015	Koram	Periwinkles	14	8	0.6	112
68	5_10_2015	Koram	Periwinkles	7	4	0.1	28
69	5_10_2015	Koram	Periwinkles	14	6	0.6	84
70	5_10_2015	Koram	Periwinkles	13	7	0.6	91
71	5_10_2015	Koram	Periwinkles	15	8	0.8	120
72	5_10_2015	Koram	Periwinkles	16	6	0.9	96
73	5_10_2015	Koram	Periwinkles	18	7	0.8	126
74	5_10_2015	Koram	Periwinkles	12	6	0.4	72
75	5_10_2015	Koram	Periwinkles	11	6	0.2	66
76	5_10_2015	Koram	Periwinkles	14	6	0.7	84
77	5_10_2015	Koram	Periwinkles	13	6	0.5	78
78	5_10_2015	Koram	Periwinkles	13	7	0.6	91
79	5_10_2015	Koram	Periwinkles	10	5	0.2	50
80	5_10_2015	Koram	Periwinkles	11	6	0.5	66
81	5_10_2015	Koram	Periwinkles	12	7	0.6	84
82	5_10_2015	Koram	Periwinkles	14	7	0.6	98
83	5_10_2015	Koram	Periwinkles	16	8	0.8	128
84	5_10_2015	Koram	Periwinkles	14	8	0.7	112
85	5_10_2015	Koram	Periwinkles	12	5	0.4	60
86	5_10_2015	Koram	Periwinkles	13	5	0.5	65
87	5_10_2015	Koram	Periwinkles	12	7	0.6	84
88	5_10_2015	Koram	Periwinkles	13	7	0.5	91
89	5_10_2015	Koram	Periwinkles	15	7	0.8	105
90	5_10_2015	Koram	Periwinkles	15	8	0.8	120
91	5_10_2015	Koram	Periwinkles	7	3	0.1	21
92	5_10_2015	Koram	Periwinkles	6	3	0.1	18
93	5_10_2015	Koram	Periwinkles	14	7	0.8	98
94	5_10_2015	Koram	Periwinkles	13	6	0.6	78
95	5_10_2015	Koram	Periwinkles	15	6	0.7	90
96	5_10_2015	Koram	Periwinkles	13	6	0.6	78
97	5_10_2015	Koram	Periwinkles	14	7	0.7	98
98	5_10_2015	Koram	Periwinkles	7	3	0.1	21
99	5_10_2015	Koram	Periwinkles	6	3	0.1	18
100	5_10_2015	Koram	Periwinkles	12	5	0.3	60
101	5_10_2015	Koram	Periwinkles	12	5	0.5	60
102	5_10_2015	Koram	Periwinkles	14	7	0.7	98
103	5_10_2015	Koram	Periwinkles	14	7	0.6	98
104	5_10_2015	Koram	Periwinkles	14	8	0.6	112
105	5_10_2015	Koram	Periwinkles	13	7	0.6	91
106	5_10_2015	Koram	Periwinkles	11	6	0.3	66
107	5_10_2015	Koram	Periwinkles	12	7	0.5	84
108	5_10_2015	Koram	Periwinkles	11	6	0.3	66
109	5_10_2015	Koram	Periwinkles	14	6	0.6	84
110	5_10_2015	Koram	Periwinkles	10	6	0.3	60
111	5_10_2015	Koram	Periwinkles	12	6	0.5	72
112	5_10_2015	Koram	Periwinkles	10	6	0.2	60
113	5_10_2015	Koram	Periwinkles	15	8	0.8	120
114	5_10_2015	Koram	Periwinkles	10	5	0.2	50
115	5_10_2015	Koram	Periwinkles	12	6	0.4	72
116	5_10_2015	Koram	Periwinkles	15	8	0.9	120
117	5_10_2015	Koram	Periwinkles	14	7	0.6	98
118	5_10_2015	Koram	Periwinkles	14	7	0.6	98
119	5_10_2015	Koram	Periwinkles	13	7	0.6	91
120	5_10_2015	Koram	Periwinkles	14	8	0.6	112
121	5_10_2015	Koram	Periwinkles	12	6	0.5	72
122	5_10_2015	Koram	Periwinkles	11	5	0.4	55
123	5_10_2015	Koram	Periwinkles	11	5	0.3	55
124	5_10_2015	Koram	Bi_fasciated_cerith	23	8	1.7	184
125	5_10_2015	Koram	Bi_fasciated_cerith	17	7	0.9	119
126	5_10_2015	Koram	Bi_fasciated_cerith	15	6	0.7	90
127	5_10_2015	Koram	Bi_fasciated_cerith	17	7	1	119
128	5_10_2015	Koram	Bi_fasciated_cerith	18	7	1.3	126
129	5_10_2015	Koram	Bi_fasciated_cerith	19	7	1.3	133
130	5_10_2015	Koram	Bi_fasciated_cerith	19	7	1.2	133
131	5_10_2015	Koram	Bi_fasciated_cerith	18	7	1.3	126
132	5_10_2015	Koram	Bi_fasciated_cerith	16	7	1.1	112
133	5_10_2015	Koram	Bi_fasciated_cerith	17	7	1	119
134	5_10_2015	Koram	Bi_fasciated_cerith	16	6	0.7	96
135	5_10_2015	Koram	Bi_fasciated_cerith	19	8	1.4	152
136	5_10_2015	Koram	Bi_fasciated_cerith	19	8	1.4	152
137	5_10_2015	Koram	Bi_fasciated_cerith	16	7	0.8	112
138	5_10_2015	Koram	Bi_fasciated_cerith	19	8	1.3	152
139	5_10_2015	Koram	Bi_fasciated_cerith	17	8	1	136
140	5_10_2015	Koram	Bi_fasciated_cerith	15	6	0.5	90
141	5_10_2015	Koram	Bi_fasciated_cerith	14	6	0.5	84
142	5_10_2015	Koram	Bi_fasciated_cerith	18	8	1.3	144
143	5_10_2015	Koram	Bi_fasciated_cerith	15	6	0.5	90
144	5_10_2015	Koram	Bi_fasciated_cerith	15	5	0.6	75
145	5_10_2015	Koram	Bi_fasciated_cerith	17	8	0.9	136
146	5_10_2015	Koram	Bi_fasciated_cerith	16	8	0.8	128
147	5_10_2015	Koram	Bi_fasciated_cerith	11	5	0.2	55
148	5_10_2015	Koram	Bi_fasciated_cerith	14	6	0.5	84
149	5_10_2015	Koram	Bi_fasciated_cerith	15	7	0.6	105
150	5_10_2015	Koram	Bi_fasciated_cerith	14	5	0.5	70
151	5_10_2015	Koram	Bi_fasciated_cerith	18	6	0.9	108
152	5_10_2015	Koram	Bi_fasciated_cerith	15	8	0.9	120
153	5_10_2015	Koram	Bi_fasciated_cerith	11	4	0.2	44
154	5_10_2015	Koram	Bi_fasciated_cerith	12	6	0.4	72
155	5_10_2015	Koram	Bi_fasciated_cerith	16	7	0.8	112
156	5_10_2015	Koram	Bi_fasciated_cerith	21	8	1.6	168
157	5_10_2015	Koram	Bi_fasciated_cerith	20	10	1.5	200
158	5_10_2015	Koram	Bi_fasciated_cerith	14	7	0.5	98
159	5_10_2015	Koram	Bi_fasciated_cerith	14	5	0.5	70
160	5_10_2015	Koram	Bi_fasciated_cerith	10	4	0.1	40
161	5_10_2015	Koram	Bi_fasciated_cerith	16	6	0.8	96
162	5_10_2015	Koram	Bi_fasciated_cerith	15	6	0.6	90
163	5_10_2015	Koram	Bi_fasciated_cerith	15	6	0.6	90
164	5_10_2015	Koram	Bi_fasciated_cerith	16	8	0.9	128
165	5_10_2015	Koram	Bi_fasciated_cerith	16	7	0.7	112
166	5_10_2015	Koram	Bi_fasciated_cerith	15	7	0.6	105
167	5_10_2015	Koram	Bi_fasciated_cerith	17	6	0.8	102
168	5_10_2015	Koram	Bi_fasciated_cerith	15	7	0.7	105
169	5_10_2015	Koram	Bi_fasciated_cerith	14	6	0.6	84
170	5_10_2015	Koram	Bi_fasciated_cerith	15	6	0.7	90
171	5_10_2015	Koram	Bi_fasciated_cerith	11	5	0.3	55
172	5_10_2015	Koram	Bi_fasciated_cerith	14	5	0.5	70
173	5_10_2015	Koram	Bi_fasciated_cerith	19	10	1.1	190
174	5_10_2015	Koram	Bi_fasciated_cerith	15	6	0.6	90
175	5_10_2015	Koram	Bi_fasciated_cerith	17	7	0.9	119
176	5_10_2015	Koram	Bi_fasciated_cerith	14	6	0.7	84
177	5_10_2015	Koram	Bi_fasciated_cerith	19	8	1.1	152
178	5_10_2015	Koram	Bi_fasciated_cerith	23	10	1.6	230
179	5_10_2015	Koram	Bi_fasciated_cerith	20	7	1.4	140
180	5_10_2015	Koram	Bi_fasciated_cerith	17	7	0.8	119
181	5_10_2015	Koram	Bi_fasciated_cerith	15	6	0.7	90
182	5_10_2015	Koram	Bi_fasciated_cerith	16	7	0.8	112
183	5_10_2015	Koram	Bi_fasciated_cerith	19	7	1.1	133
184	5_10_2015	Koram	Bi_fasciated_cerith	15	7	0.7	105
185	5_10_2015	Koram	Bi_fasciated_cerith	16	8	0.9	128
186	5_10_2015	Koram	Bi_fasciated_cerith	14	6	0.7	84
187	5_10_2015	Koram	Bi_fasciated_cerith	16	7	0.9	112
188	5_10_2015	Koram	Bi_fasciated_cerith	14	6	0.5	84
189	5_10_2015	Koram	Bi_fasciated_cerith	17	7	0.8	119
190	5_10_2015	Koram	Bi_fasciated_cerith	17	8	1.1	136
191	5_10_2015	Koram	Bi_fasciated_cerith	17	8	0.9	136
192	5_10_2015	Koram	Bi_fasciated_cerith	14	6	0.5	84
193	5_10_2015	Koram	Bi_fasciated_cerith	13	6	0.5	78
194	5_10_2015	Koram	Bi_fasciated_cerith	19	8	1.2	152
195	5_10_2015	Koram	Bi_fasciated_cerith	15	6	0.6	90
196	5_10_2015	Koram	Bi_fasciated_cerith	16	7	0.7	112
197	5_10_2015	Koram	Bi_fasciated_cerith	16	8	0.8	128
198	5_10_2015	Koram	Bi_fasciated_cerith	17	7	0.9	119
199	5_10_2015	Koram	Bi_fasciated_cerith	15	7	0.8	105
200	5_10_2015	Koram	Bi_fasciated_cerith	14	6	0.7	84
201	5_10_2015	Koram	Bi_fasciated_cerith	14	6	0.5	84
202	5_10_2015	Koram	Bi_fasciated_cerith	12	6	0.5	72
203	5_10_2015	Koram	Bi_fasciated_cerith	12	5	0.5	60
204	5_10_2015	Koram	Bi_fasciated_cerith	13	6	0.5	78
205	5_10_2015	Koram	Bi_fasciated_cerith	11	4	0.2	44
206	5_10_2015	Koram	Bi_fasciated_cerith	13	5	0.5	65
207	5_10_2015	Koram	Bi_fasciated_cerith	15	8	0.8	120
208	5_10_2015	Koram	Bi_fasciated_cerith	19	8	1.1	152
209	5_10_2015	Koram	Bi_fasciated_cerith	20	8	1.5	160
210	5_10_2015	Koram	Bi_fasciated_cerith	21	10	1.5	210
211	5_10_2015	Koram	Bi_fasciated_cerith	18	7	0.9	126
212	5_10_2015	Koram	Bi_fasciated_cerith	17	8	1	136
213	5_10_2015	Koram	Bi_fasciated_cerith	18	6	0.5	108
214	5_10_2015	Koram	Bi_fasciated_cerith	17	7	1.1	119
215	5_10_2015	Koram	Bi_fasciated_cerith	16	6	0.9	96
216	5_10_2015	Koram	Bi_fasciated_cerith	18	7	1	126
217	5_10_2015	Koram	Bi_fasciated_cerith	14	7	0.7	98
218	5_10_2015	Koram	Bi_fasciated_cerith	14	5	0.4	70
219	5_10_2015	Koram	Bi_fasciated_cerith	15	7	0.7	105
220	5_10_2015	Koram	Bi_fasciated_cerith	11	5	0.3	55
221	5_10_2015	Koram	Bi_fasciated_cerith	16	6	0.7	96
222	5_10_2015	Koram	Bi_fasciated_cerith	16	7	0.8	112
223	5_10_2015	Koram	Bi_fasciated_cerith	17	8	1.1	136
224	5_10_2015	Koram	Bi_fasciated_cerith	20	9	1.4	180
225	5_10_2015	Koram	Bi_fasciated_cerith	16	7	0.8	112
226	5_10_2015	Koram	Bi_fasciated_cerith	17	8	0.9	136
227	5_10_2015	Koram	Bi_fasciated_cerith	19	8	1.3	152
228	5_10_2015	Koram	Bi_fasciated_cerith	12	5	0.4	60
229	5_10_2015	Koram	Bi_fasciated_cerith	18	7	1.1	126
230	5_10_2015	Koram	Bi_fasciated_cerith	14	5	0.4	70
231	5_10_2015	Koram	Bi_fasciated_cerith	13	5	0.5	65
232	5_10_2015	Koram	Bi_fasciated_cerith	14	7	0.6	98
233	5_10_2015	Koram	Bi_fasciated_cerith	12	5	0.3	60
234	5_10_2015	Koram	Bi_fasciated_cerith	16	6	0.8	96
235	5_10_2015	Koram	Bi_fasciated_cerith	18	8	1.1	144
236	5_10_2015	Koram	Bi_fasciated_cerith	19	9	1.1	171
237	5_10_2015	Koram	Bi_fasciated_cerith	18	7	1.1	126
238	5_10_2015	Koram	Bi_fasciated_cerith	15	6	0.7	90
239	5_10_2015	Koram	Bi_fasciated_cerith	12	5	0.3	60
240	5_10_2015	Koram	Bi_fasciated_cerith	14	6	0.5	84
241	5_10_2015	Koram	Bi_fasciated_cerith	12	6	0.6	72
242	5_10_2015	Koram	Bi_fasciated_cerith	15	8	0.9	120
245	6_10_2015	NomSao	Periwinkles	22	11	2.5	242
246	6_10_2015	NomSao	Periwinkles	24	12	2.6	288
247	6_10_2015	NomSao	Periwinkles	22	10	2.2	220
248	6_10_2015	NomSao	Periwinkles	21	11	1.9	231
249	6_10_2015	NomSao	Periwinkles	25	14	3.6	350
250	6_10_2015	NomSao	Periwinkles	25	12	3.2	300
251	6_10_2015	NomSao	Periwinkles	19	9	1.3	171
252	6_10_2015	NomSao	Periwinkles	25	12	3.2	300
253	6_10_2015	NomSao	Periwinkles	22	12	2.8	264
254	6_10_2015	NomSao	Periwinkles	24	12	2.6	288
255	6_10_2015	NomSao	Periwinkles	23	12	2.8	276
256	6_10_2015	NomSao	Periwinkles	22	12	2.4	264
257	6_10_2015	NomSao	Periwinkles	20	11	2.1	220
258	6_10_2015	NomSao	Periwinkles	23	10	2.6	230
259	6_10_2015	NomSao	Periwinkles	20	11	1.7	220
260	6_10_2015	NomSao	Periwinkles	19	9	1.4	171
261	6_10_2015	NomSao	Periwinkles	23	10	2.5	230
262	6_10_2015	NomSao	Periwinkles	24	14	2.6	336
263	6_10_2015	NomSao	Periwinkles	22	13	2.5	286
264	6_10_2015	NomSao	Periwinkles	18	10	1.2	180
265	6_10_2015	NomSao	Periwinkles	20	11	1.8	220
266	6_10_2015	NomSao	Periwinkles	18	10	1.3	180
267	6_10_2015	NomSao	Periwinkles	20	12	2	240
268	6_10_2015	NomSao	Periwinkles	24	13	2.6	312
269	6_10_2015	NomSao	Periwinkles	25	11	3.1	275
270	6_10_2015	NomSao	Periwinkles	18	11	1.2	198
271	6_10_2015	NomSao	Periwinkles	21	10	2	210
272	6_10_2015	NomSao	Periwinkles	21	10	2.3	210
273	6_10_2015	NomSao	Periwinkles	20	10	1.5	200
274	6_10_2015	NomSao	Periwinkles	20	10	1.4	200
275	6_10_2015	NomSao	Periwinkles	20	11	1.9	220
276	6_10_2015	NomSao	Periwinkles	22	10	2.4	220
277	6_10_2015	NomSao	Periwinkles	20	11	1.9	220
278	6_10_2015	NomSao	Periwinkles	16	9	0.9	144
279	6_10_2015	NomSao	Periwinkles	17	9	1.1	153
280	6_10_2015	NomSao	Periwinkles	21	11	2.2	231
281	6_10_2015	NomSao	Periwinkles	19	10	1.3	190
282	6_10_2015	NomSao	Periwinkles	20	10	1.6	200
283	6_10_2015	NomSao	Periwinkles	17	9	0.9	153
284	6_10_2015	NomSao	Periwinkles	20	10	1.4	200
285	6_10_2015	NomSao	Periwinkles	17	7	1	119
286	6_10_2015	NomSao	Periwinkles	20	10	1.7	200
287	6_10_2015	NomSao	Periwinkles	21	11	2.2	231
288	6_10_2015	NomSao	Periwinkles	20	10	1.7	200
289	6_10_2015	NomSao	Periwinkles	19	10	1.5	190
290	6_10_2015	NomSao	Periwinkles	25	12	3.6	300
291	6_10_2015	NomSao	Periwinkles	21	11	2	231
292	6_10_2015	NomSao	Periwinkles	24	12	3.1	288
293	6_10_2015	NomSao	Periwinkles	20	9	1.6	180
294	6_10_2015	NomSao	Periwinkles	20	7	1.4	140
295	6_10_2015	NomSao	Periwinkles	18	11	1.4	198
296	6_10_2015	NomSao	Periwinkles	18	10	1.3	180
297	6_10_2015	NomSao	Periwinkles	20	11	1.7	220
298	6_10_2015	NomSao	Periwinkles	17	8	1.2	136
299	6_10_2015	NomSao	Periwinkles	22	12	2.5	264
300	6_10_2015	NomSao	Periwinkles	17	10	1	170
301	6_10_2015	NomSao	Periwinkles	21	11	2.1	231
302	6_10_2015	NomSao	Periwinkles	15	7	0.8	105
303	6_10_2015	NomSao	Periwinkles	21	14	2.5	294
304	6_10_2015	NomSao	Periwinkles	17	9	1	153
305	6_10_2015	NomSao	Periwinkles	19	10	1.5	190
306	6_10_2015	NomSao	Periwinkles	20	10	1.3	200
307	6_10_2015	NomSao	Periwinkles	20	11	1.9	220
308	6_10_2015	NomSao	Periwinkles	18	10	1.3	180
309	6_10_2015	NomSao	Periwinkles	17	10	1.2	170
310	6_10_2015	NomSao	Periwinkles	20	11	1.7	220
311	6_10_2015	NomSao	Periwinkles	21	11	1.9	231
312	6_10_2015	NomSao	Periwinkles	20	10	1.3	200
313	6_10_2015	NomSao	Periwinkles	18	9	1.2	162
314	6_10_2015	NomSao	Periwinkles	20	11	1.6	220
315	6_10_2015	NomSao	Periwinkles	19	10	1.3	190
316	6_10_2015	NomSao	Periwinkles	16	9	0.9	144
317	6_10_2015	NomSao	Periwinkles	17	9	1.1	153
318	6_10_2015	NomSao	Periwinkles	18	9	1.2	162
319	6_10_2015	NomSao	Periwinkles	17	10	1.1	170
320	6_10_2015	NomSao	Periwinkles	17	9	1	153
321	6_10_2015	NomSao	Periwinkles	19	10	1.4	190
322	6_10_2015	NomSao	Periwinkles	16	8	0.9	128
323	6_10_2015	NomSao	Periwinkles	18	10	1.3	180
324	6_10_2015	NomSao	Periwinkles	17	10	1	170
325	6_10_2015	NomSao	Periwinkles	17	10	1.1	170
326	6_10_2015	NomSao	Periwinkles	19	9	1.3	171
327	6_10_2015	NomSao	Periwinkles	20	12	1.9	240
328	6_10_2015	NomSao	Periwinkles	19	11	1.4	209
329	6_10_2015	NomSao	Periwinkles	19	10	1.3	190
330	6_10_2015	NomSao	Periwinkles	17	9	1.1	153
331	6_10_2015	NomSao	Periwinkles	18	9	1.1	162
332	6_10_2015	NomSao	Periwinkles	16	7	0.8	112
333	6_10_2015	NomSao	Periwinkles	17	10	1.1	170
334	6_10_2015	NomSao	Periwinkles	16	9	0.9	144
335	6_10_2015	NomSao	Periwinkles	17	10	1	170
336	6_10_2015	NomSao	Periwinkles	20	10	1.3	200
337	6_10_2015	NomSao	Periwinkles	19	10	1.2	190
338	6_10_2015	NomSao	Periwinkles	19	9	1.2	171
339	6_10_2015	NomSao	Periwinkles	18	9	1	162
340	6_10_2015	NomSao	Periwinkles	16	8	0.8	128
341	6_10_2015	NomSao	Periwinkles	19	10	1.3	190
342	6_10_2015	NomSao	Periwinkles	17	9	1	153
343	6_10_2015	NomSao	Periwinkles	17	9	1	153
344	6_10_2015	NomSao	Periwinkles	17	8	0.9	136
446	6_10_2015	NomSao	Bi_fasciated_cerith	24	11	1.9	264
447	6_10_2015	NomSao	Bi_fasciated_cerith	23	12	1.6	276
448	6_10_2015	NomSao	Bi_fasciated_cerith	18	10	1.1	180
449	6_10_2015	NomSao	Bi_fasciated_cerith	19	9	1.2	171
450	6_10_2015	NomSao	Bi_fasciated_cerith	20	8	0.9	160
451	6_10_2015	NomSao	Bi_fasciated_cerith	20	9	1.3	180
452	6_10_2015	NomSao	Bi_fasciated_cerith	22	9	1.7	198
453	6_10_2015	NomSao	Bi_fasciated_cerith	20	9	1.3	180
454	6_10_2015	NomSao	Bi_fasciated_cerith	21	9	1.4	189
455	6_10_2015	NomSao	Bi_fasciated_cerith	20	10	1.2	200
456	6_10_2015	NomSao	Bi_fasciated_cerith	18	8	1.6	144
457	6_10_2015	NomSao	Bi_fasciated_cerith	16	8	1.8	128
458	6_10_2015	NomSao	Bi_fasciated_cerith	19	8	1.9	152
459	6_10_2015	NomSao	Bi_fasciated_cerith	19	9	1.2	171
460	6_10_2015	NomSao	Bi_fasciated_cerith	21	10	1.3	210
461	6_10_2015	NomSao	Bi_fasciated_cerith	21	9	1.2	189
462	6_10_2015	NomSao	Bi_fasciated_cerith	20	9	1.1	180
463	6_10_2015	NomSao	Bi_fasciated_cerith	20	9	1.1	180
464	6_10_2015	NomSao	Bi_fasciated_cerith	23	9	1.4	207
465	6_10_2015	NomSao	Bi_fasciated_cerith	19	8	1.1	152
466	6_10_2015	NomSao	Bi_fasciated_cerith	19	7	0.9	133
467	6_10_2015	NomSao	Bi_fasciated_cerith	20	9	1.4	180
468	6_10_2015	NomSao	Bi_fasciated_cerith	15	7	0.7	105
469	6_10_2015	NomSao	Bi_fasciated_cerith	17	7	1.1	119
470	6_10_2015	NomSao	Bi_fasciated_cerith	21	10	1.4	210
471	6_10_2015	NomSao	Bi_fasciated_cerith	22	10	1.7	220
472	6_10_2015	NomSao	Bi_fasciated_cerith	17	8	1.2	136
473	6_10_2015	NomSao	Bi_fasciated_cerith	19	8	1.1	152
474	6_10_2015	NomSao	Bi_fasciated_cerith	21	8	1.6	168
475	6_10_2015	NomSao	Bi_fasciated_cerith	17	7	1.7	119
476	6_10_2015	NomSao	Bi_fasciated_cerith	19	9	1.4	171
477	6_10_2015	NomSao	Bi_fasciated_cerith	19	7	0.8	133
478	6_10_2015	NomSao	Bi_fasciated_cerith	21	9	1.3	189
479	6_10_2015	NomSao	Bi_fasciated_cerith	19	8	1	152
480	6_10_2015	NomSao	Bi_fasciated_cerith	24	10	1.8	240
481	6_10_2015	NomSao	Bi_fasciated_cerith	10	10	0.4	100
482	6_10_2015	NomSao	Bi_fasciated_cerith	17	10	0.8	170
483	6_10_2015	NomSao	Bi_fasciated_cerith	19	10	0.9	190
484	6_10_2015	NomSao	Bi_fasciated_cerith	21	10	1.4	210
485	6_10_2015	NomSao	Bi_fasciated_cerith	17	7	0.9	119
486	6_10_2015	NomSao	Bi_fasciated_cerith	15	7	0.6	105
487	6_10_2015	NomSao	Bi_fasciated_cerith	21	11	1.3	231
488	6_10_2015	NomSao	Bi_fasciated_cerith	20	10	1.3	200
489	6_10_2015	NomSao	Bi_fasciated_cerith	20	9	1.1	180
490	6_10_2015	NomSao	Bi_fasciated_cerith	18	7	1.1	126
491	6_10_2015	NomSao	Bi_fasciated_cerith	18	8	0.8	144
492	6_10_2015	NomSao	Bi_fasciated_cerith	18	10	1.2	180
493	6_10_2015	NomSao	Bi_fasciated_cerith	16	7	0.8	112
494	6_10_2015	NomSao	Bi_fasciated_cerith	20	7	1.4	140
495	6_10_2015	NomSao	Bi_fasciated_cerith	19	8	0.9	152
496	6_10_2015	NomSao	Bi_fasciated_cerith	17	9	0.9	153
497	6_10_2015	NomSao	Bi_fasciated_cerith	17	8	0.9	136
498	6_10_2015	NomSao	Bi_fasciated_cerith	21	9	1.4	189
499	6_10_2015	NomSao	Bi_fasciated_cerith	19	8	0.9	152
500	6_10_2015	NomSao	Bi_fasciated_cerith	18	9	0.6	162
501	6_10_2015	NomSao	Bi_fasciated_cerith	22	7	1.2	154
502	6_10_2015	NomSao	Bi_fasciated_cerith	21	9	1.4	189
503	6_10_2015	NomSao	Bi_fasciated_cerith	18	9	1.1	162
504	6_10_2015	NomSao	Bi_fasciated_cerith	21	11	1.6	231
505	6_10_2015	NomSao	Bi_fasciated_cerith	21	9	1.3	189
506	6_10_2015	NomSao	Bi_fasciated_cerith	17	9	1.1	153
507	6_10_2015	NomSao	Bi_fasciated_cerith	19	8	1	152
508	6_10_2015	NomSao	Bi_fasciated_cerith	17	7	1	119
509	6_10_2015	NomSao	Bi_fasciated_cerith	21	10	1.6	210
510	6_10_2015	NomSao	Bi_fasciated_cerith	18	10	1	180
511	6_10_2015	NomSao	Bi_fasciated_cerith	19	8	1.1	152
512	6_10_2015	NomSao	Bi_fasciated_cerith	21	10	1.3	210
513	6_10_2015	NomSao	Bi_fasciated_cerith	16	10	0.9	160
514	6_10_2015	NomSao	Bi_fasciated_cerith	14	10	1	140
515	6_10_2015	NomSao	Bi_fasciated_cerith	13	9	0.9	117
516	6_10_2015	NomSao	Bi_fasciated_cerith	15	7	0.7	105
517	6_10_2015	NomSao	Bi_fasciated_cerith	16	4	0.7	64
518	6_10_2015	NomSao	Bi_fasciated_cerith	17	9	1.2	153
519	6_10_2015	NomSao	Bi_fasciated_cerith	13	8	0.5	104
520	6_10_2015	NomSao	Bi_fasciated_cerith	15	8	1.1	120
521	6_10_2015	NomSao	Bi_fasciated_cerith	15	7	0.7	105
522	6_10_2015	NomSao	Bi_fasciated_cerith	21	7	1.4	147
523	6_10_2015	NomSao	Bi_fasciated_cerith	15	7	0.8	105
524	6_10_2015	NomSao	Bi_fasciated_cerith	19	9	1.3	171
525	6_10_2015	NomSao	Bi_fasciated_cerith	17	8	1.1	136
526	6_10_2015	NomSao	Bi_fasciated_cerith	19	9	1.2	171
527	6_10_2015	NomSao	Bi_fasciated_cerith	17	9	0.9	153
528	6_10_2015	NomSao	Bi_fasciated_cerith	17	8	0.7	136
529	6_10_2015	NomSao	Bi_fasciated_cerith	17	8	1	136
530	6_10_2015	NomSao	Bi_fasciated_cerith	16	8	0.7	128
531	6_10_2015	NomSao	Bi_fasciated_cerith	17	7	0.5	119
532	6_10_2015	NomSao	Bi_fasciated_cerith	19	9	1.1	171
533	6_10_2015	NomSao	Bi_fasciated_cerith	23	9	1.6	207
534	6_10_2015	NomSao	Bi_fasciated_cerith	19	8	1.1	152
535	6_10_2015	NomSao	Bi_fasciated_cerith	20	9	1.2	180
536	6_10_2015	NomSao	Bi_fasciated_cerith	12	7	0.9	84
537	6_10_2015	NomSao	Bi_fasciated_cerith	17	8	0.9	136
538	6_10_2015	NomSao	Bi_fasciated_cerith	17	8	0.9	136
539	6_10_2015	NomSao	Bi_fasciated_cerith	20	9	1.4	180
540	6_10_2015	NomSao	Bi_fasciated_cerith	20	8	1.1	160
541	6_10_2015	NomSao	Bi_fasciated_cerith	19	7	1.2	133
542	6_10_2015	NomSao	Bi_fasciated_cerith	20	7	1.1	140
543	6_10_2015	NomSao	Bi_fasciated_cerith	14	6	0.5	84
544	6_10_2015	NomSao	Bi_fasciated_cerith	18	7	1.1	126
545	6_10_2015	NomSao	Bi_fasciated_cerith	18	8	0.9	144
546	6_10_2015	NomSao	Bi_fasciated_cerith	17	8	0.9	136
