# Supplementary material for: Resource depletion through primate stone technology
Source: eLife. 2017 Sep 8;6:e23647. doi: 10.7554/eLife.23647 (PMC5590808; doi:10.7554/eLife.23647)
Supplement: Source data 1. — The number of prey items consumed during behavioral observation of daily shellfish foraging on Koram Island, Thailand. [file elife-23647-data1.xls]

## Sheet: all_inds_data
ID	sex	N.obs	dur.h	items	Oysters	Periwinkles	it.h	oy.h	per.h	p.oy
Asg	M	71	5.91667	199	141	0	33.6338	23.831	0	0.793768
Chg	M	70	5.83333	305	214	22	52.2857	36.6857	3.77143	0.729664
Chk	M	75	6.25	222	168	10	35.52	26.88	1.6	0.744945
Chl	M	65	5.41667	205	169	5	37.8462	31.2	0.923077	0.797749
Cht	F	61	5.08333	263	199	3	51.7377	39.1475	0.590164	0.778141
Dto	M	69	5.75	246	150	23	42.7826	26.087	4	0.661426
Grb	M	49	4.08333	171	148	0	41.8776	36.2449	0	0.77945
Hee	M	78	6.5	348	264	11	53.5385	40.6154	1.69231	0.766242
Hep	F	144	12	312	251	24	26	20.9167	2	0.833887
Hgp	M	68	5.66667	261	196	9	46.0588	34.5882	1.58824	0.715175
Htk	F	65	5.41667	244	144	30	45.0462	26.5846	5.53846	0.615263
Jan	F	71	5.91667	319	239	24	53.9155	40.3944	4.05634	0.713613
Kmk	F	84	7	321	260	8	45.8571	37.1429	1.14286	0.812863
Kmy	M	59	4.91667	102	87	0	20.7458	17.6949	0	0.792741
Krg	M	60	5	153	153	0	30.6	30.6	0	0.833333
Kwg	F	166	13.8333	671	503	19	48.506	36.3614	1.37349	0.862031
Kwn	M	44	3.66667	94	91	0	25.6364	24.8182	0	0.780203
Lhm	F	69	5.75	251	175	16	43.6522	30.4348	2.78261	0.689921
Moo	M	73	6.08333	272	212	9	44.7123	34.8493	1.47945	0.736847
Mrk	F	136	11.3333	589	446	11	51.9706	39.3529	0.970588	0.849571
Nak	M	73	6.08333	305	234	11	50.137	38.4658	1.80822	0.735532
Ngr	F	124	10.3333	531	415	4	51.3871	40.1613	0.387097	0.865689
Nhk	F	187	15.5833	785	506	47	50.3743	32.4706	3.01604	0.780413
Noi	F	67	5.58333	555	445	11	99.403	79.7015	1.97015	0.792657
Pet	F	72	6	360	293	10	60	48.8333	1.66667	0.800546
Plw	M	62	5.16667	341	318	0	66	61.5484	0	0.819588
